1 **Characterization of SARS-CoV-2 ORF6 deletion variants detected in a nosocomial cluster**  
2 **during routine genomic surveillance, Lyon, France**

3

4 **Running title: SARS-CoV-2 ORF6 deletion variant detected in COVID-19 cluster**

5

6 Grégory Quéromès<sup>1\*</sup>, Grégory Destras<sup>1,2\*</sup>, Antonin Bal<sup>1,2</sup>, Hadrien Regue<sup>2</sup>, Gwendolyne Burfin<sup>2,3</sup>,  
7 Solenne Brun<sup>2,3</sup>, Rémi Farget<sup>2,3</sup>, Florence Morfin<sup>1,2</sup>, Martine Valette<sup>1,2,3</sup>, Bruno Lina<sup>1,2,3</sup>, Emilie  
8 Frobert<sup>1,2</sup>, and Laurence Josset<sup>1,2</sup>

9 <sup>1</sup> CIRI, Centre International de Recherche en Infectiologie, Team VirPatH, Univ Lyon, Inserm,  
10 U1111, Université Claude Bernard Lyon 1, CNRS, UMR5308, ENS de Lyon, F-69007, Lyon, FR

11 <sup>2</sup> Laboratoire de Virologie, Institut des Agents Infectieux (IAI), Hospices Civils de Lyon, Groupement  
12 Hospitalier Nord, F-69004, Lyon, FR

13 <sup>3</sup> Centre National de Référence des virus des infections respiratoires, France Sud, Hospices  
14 Civils de Lyon, Groupement Hospitalier Nord, Hôpital de la Croix-Rousse, F-69004, Lyon, FR

15 \*Co-authors

16

17 **Corresponding author:** Laurence Josset, PharmaD, PhD

18 Associate Professor  
19 Hospices Civils de Lyon  
20 National reference center for respiratory viruses  
21 103 Grande-Rue de la Croix Rouse  
22 69317, Lyon, France  
23 Telephone: +33 (0)4 72 07 10 22  
24 Email: laurence.josset@chu-lyon.fr

25

26

27 **Abstract (250 word maximum)**

28 Through routine genomic surveillance of the novel SARS-CoV-2 virus (n=229 whole genome  
29 sequences), 2 different frameshifting deletions were newly detected in the open reading frame (ORF)  
30 6, starting at the same position (27267). While the 26-nucleotide deletion variant was only found in  
31 one sample in March 2020, the 34-nucleotide deletion variant was found within a single geriatric  
32 hospital unit in 5/9 patients sequenced and one health care worker with samples collected between  
33 April 2<sup>nd</sup> and 9<sup>th</sup>, 2020. Both the presence of the 34-nucleotide deletion variant limited to this unit and  
34 the clustering of the corresponding whole genome sequences by phylogeny analysis strongly  
35 suggested a nosocomial transmission between patients. Interestingly, prolonged viral excretion of the  
36 34-nucleotide deletion variant was identified in a stool sample 14 days after initial diagnosis for one  
37 patient. Clinical data revealed no significant difference in disease severity between patients harboring  
38 the wild-type or the 34-nucleotide deletion variants. The *in vitro* infection of the two deletion variants  
39 on primate endothelial kidney cells (BGM) and human lung adenocarcinoma cells (Calu-3) yielded  
40 comparable replication kinetics with the wild-type strain. Furthermore, high viral loads were found *in*  
41 *vivo* regardless of the presence or absence of the ORF6 deletion. Our study highlights the  
42 transmission and replication capacity of two newly described deletion variants in the same ORF6  
43 region.

44

45 **Importance (150 word maximum)**

46 While the SARS-CoV-2 genome has remained relatively stable since its emergence in the human  
47 population, genomic deletions are an evolutionary pattern previously described for the related SARS-  
48 CoV. Real-time genomic monitoring of the circulating variants is paramount to detect strain  
49 prevalence and transmission dynamics. Given the role of ORF6 in interferon modulation, further  
50 characterization, such as mechanistic interactions and interferon monitoring in patients, is crucial in  
51 understanding the viral-host factors driving disease evolution.

## 52 **Introduction**

53 The coronavirus disease 2019 (COVID-19) pandemic triggered by the novel severe acute respiratory  
54 syndrome coronavirus 2 (SARS-CoV-2) virus has continued to spread globally since its emergence in  
55 China in late 2019 (1, 2). Countries and localities have implemented various levels of public health  
56 mitigation measures with debatable success in an effort to control virus propagation (3–6). The  
57 challenge in better understanding the fundamental characteristics of this novel virus includes the  
58 heterogeneous disease reports in conjunction with no clear treatments or vaccines yet available or  
59 approved (7–9). Epidemiological tracking is paramount in the context of this current pandemic (10,  
60 11). In particular, the genomic surveillance of circulating virus variants, such as with the seasonal  
61 epidemics of the influenza virus or even with the 2003 SARS epidemic, has brought useful information  
62 in understanding their respective evolutionary dynamics (12, 13). Recent tracking reports have  
63 discussed the high frequency and global distribution of a variant harboring the D614G substitution  
64 located on the SARS-CoV-2 spike protein. While higher infectious titer and increased protein stability  
65 have been associated with this variant, a clear fitness advantage has not been unequivocally  
66 established (14, 15). Historically, evolution of the related SARS-CoV virus is defined by deletion  
67 regions that impact the open-reading frames (ORF) of its genome (16, 17). Several deletions of large  
68 variations in size and prevalence have already been described in the SARS-CoV-2 genome (18–20).

69 The aim of this study was to therefore describe clinical patient data and the viral replication capacity  
70 of two newly detected ORF6 deletion variants detected in early April from routine genomic  
71 surveillance of COVID-19 patients in Lyon, France.

72

## 73 **Results**

### 74 **ORF6 Deletion Variants Detected During Routine Genomic Surveillance**

75 As part of the Auvergne-Rhône-Alpes (ARA) regional surveillance, 229 samples collected between  
76 Feb 2<sup>nd</sup> and April 12<sup>th</sup> were sequenced by the French National Reference Center of Respiratory  
77 Viruses. These samples originated mainly from the Hospices Civils de Lyon (HCL) (149 sequences  
78 from 58 units within 11 different hospital sites), with some from other hospitals in the Lyon area (24  
79 sequences) and other regional hospitals (56 sequences, 12 cities).

80 Of these 229 samples, 6 sequences were shown to carry a 34-nt deletion (at position 27267-27300),  
81 henceforth denoted as D34, and 1 sequence a 26-nt deletion (at position 27267-27292), denoted as  
82 D26 (Figure 1). These deletions are both frameshifting deletions in the ORF6, starting at the same  
83 27267 position after a stretch of 3 T at 27264-27266 (Figure 2). Because of the frameshifting, the D34  
84 variant generates a premature stop codon (at position 27308, Wuhan-Hu-1 numbering), resulting in a  
85 presumed truncated 24 amino acid protein, instead of 61 in the wild-type (Wuhan-Hu-1 and all other  
86 sequences described yet). The D26 variant yields a 28 amino acid protein with its premature stop  
87 codon at position 27312 (Wuhan-Hu-1 numbering) (Figure 2). These deletions have not yet been  
88 described on the CoV-GLUE resource, which lists all genomic variants in SARS-CoV-2 sequences  
89 available on the GISAID database (Supplementary Data 1). Of note, ORF6 variants are annotated at  
90 different positions in CoV-GLUE to maximize amino acid alignment.

91 The 7 sequences carrying an ORF6 deletion belong to lineage B1, a lineage widely circulating in  
92 Europe (Supplementary Data 1). There were between 0 and 3 SNP (Single Nucleotide Polymorphism)  
93 differences among D34 strains, for which 3/6 mutants displayed 1 to 3 SNPs, and between 2 and 4  
94 SNPs between D26 and D34 strains (Supplementary Data 2).

#### 95 **Evidence for direct transmission of the ORF6 34-nt deletion variant**

96 The D34 samples were all collected from hospitalized patients or health care workers (HCW) in the  
97 same geriatric rehabilitation unit in the Hospices Civils de Lyon (GRU-3), between April 2<sup>nd</sup> and April  
98 9<sup>th</sup>, while the sample with the 26-nt deletion was collected one month earlier (March 10<sup>th</sup>) in a geriatric  
99 unit of another hospital (Table 1). The hospitals are 80 km apart and there was no evidence for the  
100 transfer of patient #73 with the 26-nt deletion into GRU-3. To track the origin of the deletion, all  
101 patients hospitalized in the GRU-3 geriatric unit and all samples collected between March 18<sup>th</sup> and  
102 April 9<sup>th</sup> with high viral loads of SARS-CoV-2 (RT-PCR Ct value <20) were sequenced (n=9). In total,  
103 44% (4/9 patients) were infected with the WT SARS-CoV-2 ORF6 (samples collected between March  
104 18<sup>th</sup> -30<sup>th</sup>), with no read carrying the deletion at a minor frequency. Out of the 4 WT SARS-CoV-2  
105 ORF6, three sequences were very similar to D34 and carried a G27289T SNP (D30Y), which has  
106 already been identified in three patients from England between April 20<sup>th</sup> and 27<sup>th</sup>, 2020 (Figure 1).  
107 The other 55% (5/9 patients), in addition to 1 HCW, were infected with the 34-nt deletion (samples  
108 collected after April 2<sup>nd</sup>) with 100% of the reads carrying the deletion for each patient. Overall, 8/9

109 sequences of GRU-3, corresponding to those of the D34 variants and those of the three WT strains  
110 carrying the ORF6 G27289T SNP were clustered together, while the sequence of the patient #38 was  
111 more divergent. We could not investigate whether the mutation spread after April 9<sup>th</sup> as only one  
112 COVID-19 patient was hospitalized in this geriatric unit since, for which their viral load (Ct>30) was  
113 too low for mNGS.

#### 114 **34-nt ORF6 deletion variants yielded similar clinical presentations as WT ORF6 in hospitalized** 115 **patients**

116 Clinical data were studied on hospitalized patients in GRU-3 (i.e. excluding the HCW #63 to better  
117 control for confounding variables (e.g. age and comorbidities)) to compare COVID-19 severity  
118 between patients infected with D34 and with WT SARS-CoV-2 (n=9) (Table 1). The median age of  
119 hospitalized patients was 87 years (ranging from 78 - 97), with 7 patients presenting at least  
120 cardiovascular disease as a risk factor (Table 1). Other comorbidities included hypertension (n=5),  
121 obesity (n=1), and chronic obstructive pulmonary disease (n=1).

122 Clinical presentations of hospitalized patients with the D34 variants (n=5) were classified as  
123 asymptomatic for one patient, upper respiratory tract infection for 2 patients, and lower respiratory  
124 tract infection (pneumonia) for 3 patients. To evaluate disease severity in relation to the D34 deletion,  
125 mild (asymptomatic and URTI, n=5) versus severe COVID-19 (LRTI, n=4) was compared by Fisher's  
126 exact test. No significant difference in clinical presentation could be observed between hospitalized  
127 patients harboring or not the ORF6 deletion (p>0.99).

128 From the five hospitalized patients harboring D34 deletion, 2 died from COVID-19 infection, all  
129 presenting LRTI and comorbidities. One patient (#25) died at day 5 after diagnosis, but their death  
130 was not related to COVID-19 infection but to septicemia. To evaluate disease outcome in relation to  
131 the D34 deletion, death from COVID-19 versus favorable outcome (including non-COVID-19 death)  
132 was compared by Fisher's exact test. No significant difference in disease outcome could be observed  
133 between hospitalized patients harboring or not the D34 deletion (p=0.44).

134 Notably, patient #47 harboring a D34 variant was still positive after 14 days in respiratory and stool  
135 samples. Virus present in the stool was 100% identical to the first virus sequenced from respiratory  
136 samples. Unfortunately, the respiratory sample at day 14 could not be sequenced due to Ct >30.

137 **SARS-CoV-2 deletion variants yield comparable replication kinetics to reference strain**

138 Two genomes representative of ORF6 deletion variants found in this regional circulation were  
139 selected for replication tests: hCoV-19/France/ARA22647/2020 (D34 variant) and hCoV-  
140 19/France/ARA0731/2020 (D26 variant). These genomes were compared against the reference  
141 genome hCoV-19/France/ARA24023/2020 (devoid of any deletions), which was the most similar  
142 isolated strain sequenced available in the laboratory at the time of the investigation. The reference  
143 genome had 1 to 3 SNPs compared with D26 and D34 variants (Supplementary Data 2).

144 Replication kinetics measured by viral genome quantification revealed no significant difference  
145 between the three strains throughout the course of *in vitro* infection on both BGM and Calu-3 cell lines  
146 (Figure 3). However, a significant difference was observed between cell lines for each strain, with an  
147 increased level of replication on BGM (as early as 24 hours post-inoculation). More specifically, viral  
148 replication spiked rapidly on BGM cells within the first 48 hours, before reaching a plateau at 72  
149 hours. Conversely, viral replication on Calu-3 cells rose steadily within the first 48 hours, before  
150 reaching a plateau at 96 hours. Of interest, a 2-log difference was observed for maximum genome  
151 quantification between BGM and Calu-3, with an average of  $5.76 \times 10^{12}$  and  $4.01 \times 10^{10}$  copies/mL,  
152 respectively.

153

154 **Discussion**

155 Despite reports of the relative stability of the SARS-CoV-2 genome within the human population,  
156 whole genome sequencing has revealed recurrent variants with variable mutation patterns over the  
157 course of the pandemic and within distinct geographic regions (10, 18, 21, 22). Here we describe  
158 clinical data and the viral replication ability associated with large ORF6 deletion variants identified  
159 through surveillance of patients from the same hospital unit. The CoV-GLUE phylogenetic resource  
160 revealed no other international sequence harboring the ORF6 deletions described herein. However,  
161 other reports of similar patterns of genomic deletions in the SARS-CoV-2 genome since its  
162 emergence have already been described, including in the ORFs 6, 7 and 8 (19, 20, 22, 23).

163 The origin of the D34 deletion is still unknown. However, as the WT virus isolated from GRU-3  
164 patients were genetically close to the D34 variants, the GRU-3 patients infected by the WT virus in

165 March could have been the initial source of the D34 deletion. Nevertheless, its introduction since April  
166 2<sup>nd</sup> with its limited presence in the hospital unit thereafter and the clustering of the corresponding  
167 whole genome sequences by phylogeny analysis strongly suggest a nosocomial transmission of the  
168 D34 variant. Importantly, the persistence of the same D34 consensus sequence in a patient's stool  
169 sample 14 days after diagnosis from a nasopharyngeal sample gives emphasis to the enteric tropism  
170 capacity of D34 variants and the potential contribution to nosocomial transmission (24). None of the  
171 GRU-3 patients with WT or deletion strains presented any intra-host diversity in the ORF6 deletion  
172 region that would have been indicative of a recent mutation or recombination.

173 The similar consensus sequences in the nasopharyngeal and in the stool samples over a 2-week  
174 period suggest an apparent low intra-host evolution. However, different sites of SARS-CoV-2  
175 replication might have a different impact on the intra-host evolution, but we could not provide the  
176 consensus sequence from the nasopharyngeal sample collected at day 14 due to low viral load to  
177 confirm this hypothesis (25). Moreover, the normal rate of mutation of SARS-CoV-2 has been  
178 reported at about 2.5 mutations per month (26, 27). Nevertheless, the fact that D34 variants had 1 to  
179 3 SNP differences between consensus sequences of D34 strains collected between one week might  
180 highlight a higher mutation rate than normal and be linked to adaptative mutations following the  
181 deletion. Evidence of adaptation by means of genomic deletions during the middle and late phases of  
182 the SARS-CoV 2003 epidemic has been tenuously described (16, 17, 28–30). Our restrictive number  
183 of sequenced strains to date does not currently allow conclusive population prevalence information for  
184 the Auvergne-Rhône-Alpes region. The importance of such genomic variants by NGS investigation  
185 during the evolution of disease transmission and population prevalence should not be overlooked (13,  
186 31, 32). Further genomic surveillance is needed to assess specific evolutionary patterns of these  
187 variants.

188 Our study characterized the D34 and D26 ORF6 variants, showing no significant impact on replication  
189 *in vitro* in comparison to a wild-type strain, in two different cell lineages. The comparable replication  
190 kinetics between wild-type and deletion strains determined *in vitro* and *in vivo* replication capacity (the  
191 latter being assessed by RT-PCR from diagnosis, Ct<20) is supported by the congruent *in vivo*  
192 replication capacity (the latter being assessed by RT-PCR from diagnosis, Ct<20). Furthermore, there  
193 was no significant difference in disease severity between patients at the GRU-3 hospital unit

194 harboring D34 ORF6 variant or WT. It is important to note that interferon immunoprofiling of patients,  
195 a key factor in disease manifestation, was not assessed and remains to be explored (33).

196 Research on the SARS-CoV ORF6 has attributed this accessory protein with potential functions of  
197 intracellular membrane rearrangements, of interferon induction inhibition, and of replication  
198 stimulation (34–36). Recent literature confirms the interferon signaling inhibitory function of the SARS-  
199 CoV-2 ORF6 protein (37). Another recent study reported a 27-nt in-frame ORF6 deletion (at position  
200 27264 - 27290) and demonstrated important three-dimensional structural alterations to the protein  
201 (23). Whereas this in-frame deletion variant would have emerged during passaging on VeroE6 cells,  
202 the D34 and D26 variants already presented these deletions in the initial clinical isolates before cell  
203 culture. Frameshift modifications, especially the -1 programmed ribosomal frameshift allowing ORF1b  
204 translation, have been known to alter coronavirus genomic and subgenomic RNA production  
205 efficiencies (38–41). And so, we can postulate that ORF6-mediated frameshifts can affect  
206 downstream elements, such as the critically multifunctional nucleocapsid (N) protein (42, 43). Further  
207 genomic and structural investigations are needed to explore the impact of these ORF6 deletions, in  
208 terms of ribosomal frameshift stimulators and RNA translation production ratios, as well as innate host  
209 immunity modulation. The integration of more fundamental research dedicated to elucidating the  
210 factors that impact SARS-CoV-2 replication, transmission, and disease progression will ultimately  
211 help translational projects to advance the fight against the current COVID-19 pandemic.

212

## 213 **Material and Methods**

### 214 **Sequencing**

215 Early routine genomic surveillance of SARS-CoV-2 in the National Reference Center (NRC) of  
216 Respiratory Viruses is based on daily random selection of samples with SARS-CoV-2 detected with  
217 quantitative reverse-transcriptase polymerase chain reaction (qRT-PCR) cycle threshold (Ct) <20 (6),  
218 which were then sequenced using an RNA metagenomic next-generation sequencing (mNGS)  
219 method previously described (18). Briefly, viral genetic material contained in nasopharyngeal and  
220 stool samples was extracted by the EMAG® platform (bioMerieux, Lyon, FR). After DNase treatment  
221 (Life Technologies, Carlsbad, CA, USA), samples underwent random amplification using Whole  
222 Transcriptome Amplification (WTA2 kit, Sigma-Aldrich, Darmstadt, DE) before sequencing on an



223 Illumina NextSeq™ 550 with mid-output 2x150 flow cell. Importantly, the strains displaying an ORF6  
224 deletion were confirmed by 3 other techniques, including capture- and amplicon-based strategies  
225 (44). Sequencing of patient samples began on Feb 8<sup>th</sup> and is ongoing. For the stool sample, an  
226 amplicon-based approach developed by the ARTIC network (<https://artic.network/ncov-2019>)  
227 combined with Oxford Nanopore Technologies sequencing was used.

## 228 **Phylogeny**

229 Multiple sequence alignment was performed using the DECIPHER package in R (45). Pairwise  
230 distances were computed using the Kimura (K80) model implemented in the function `dist.dna`,  
231 deleting the sites with missing data in a pairwise way. The phylogenetic tree was constructed using R  
232 software using `ape` package and the neighbor joining evolutionary method  
233 (hCoV19/Wuhan/IPBCAMSWH01/2019 as the root). CoV-GLUE resource [[http://cov-  
234 glue.cvr.gla.ac.uk](http://cov-glue.cvr.gla.ac.uk), (46)] was used to generate phylogenetic placement of the mutants, annotate the  
235 sequences, and check the prevalence of the deletions among worldwide sequences. Codon  
236 numbering is based on the Wuhan-Hu-1 sequence.

## 237 **Virus replication kinetics**

238 Replication kinetics was performed on both confluent buffalo green monkey (BGM) (BioWhittaker  
239 Europe) and human lung adenocarcinoma (Calu-3) cells (ATCC® HTB-55™, Plateforme iPS,  
240 NeuroMyoGene Institute, Lyon, FR) at a multiplicity of infection (MOI) of  $10^{-3}$  at 37°C for 7 days, fully  
241 respecting the WHO interim biosafety guidance related to the coronavirus disease (47). Comparative  
242 viral particle quantification of culture supernatant was performed by RdRp Institut Pasteur qRT-PCR  
243 on a QuantStudio™ 5 System (Applied Biosystems, ThermoFischer Scientific) with a standard curve  
244 after semi-automated EMAG® extraction (bioMérieux, Lyon, FR) (6). Statistical analysis was  
245 performed by two-way ANOVA with Tukey multiple comparisons between both factors of comparison  
246 (virus strain and cell line) on GraphPad Prism (software version 8.4.3).

## 247 **Ethics**

248 Samples used in this study were collected as part of an approved ongoing surveillance conducted by  
249 the National Reference Center for Respiratory Viruses (NRC) in France (WHO reference laboratory  
250 providing confirmatory testing for COVID-19). The investigations were carried out in accordance with

251 the General Data Protection Regulation (Regulation (EU) 2016/679 and Directive 95/46/EC) and the  
252 French data protection law (Law 78–17 on 06/01/1978 and Décret 2019–536 on 29/05/2019).  
253 Samples were collected for regular clinical management during hospital stay, with no additional  
254 samples for the purpose of this study. Patients were informed of the research and their non-objection  
255 approval was confirmed. This study was presented by the ethics committee of the Hospices Civils de  
256 Lyon (HCL), Lyon, France and registered on the HCL database of RIPHN studies (AGORA N°41).

#### 257 **Data availability**

258 The SARS-CoV-2 genomes sequenced in this study were deposited on the GISAID database  
259 (<https://www.gisaid.org/>) on a regular basis, accession numbers can be found in Supplementary Table  
260 1.

261

#### 262 **Acknowledgments**

263 We would like to thank all the patients, laboratory technicians, and clinicians who contributed to this  
264 investigation. We gratefully acknowledge all the members of CoV-GLUE, Nextstrain.org, and  
265 virological.org for sharing their analysis in real time.

#### 266 **Funding**

267 This study was in part funded by the ANR-20-COVI-0064 (ANR [National Research Agency])

268

#### 269 **Competing Interests**

270 The authors declare no competing interests.

271 BL is a member of the French Scientific Committee for SARS-CoV-2.

272

273 **Figure legends**

274 **FIGURE 1. Phylogenetic tree of SARS-CoV-2 full genome sequences from ARA patients**

275 **(n=229)**. The phylogenetic tree was constructed using R software using ape package and the  
276 neighbor joining evolutionary method (hCoV19/Wuhan/IPBCAMSWH01/2019 as the root). The  
277 colored branches denote the hospital unit origin of the sequence and ORF6 status. On the right,  
278 multiple sequence alignment from nucleotide position 27267-27303 (Wuhan-Hu-1 numbering) is  
279 illustrated, with the 26-nt and 34-nt deletions depicted in black. The deletion sites of interest were not  
280 included for genetic distance calculation.

281

282 **FIGURE 2. SARS-CoV-2 genome map at ORF6 position 27250-27290.** Both 34-nt (D34) and 26-nt

283 (D26) deletion regions are illustrated in green, with the Wuhan-Hu-1 reference genome in grey. Amino  
284 acids are depicted in the colored blocks above the corresponding nucleic acids. Nucleic acid and  
285 amino acid alterations resulting from the ORF6 deletions are illustrated in a black. Image adapted  
286 from the genome visualization tool from the CoV-GLUE online resource, enabled by data from  
287 GISAID.

288

289 **FIGURE 3. Replication kinetics of SARS-CoV-2 ORF6 deletion variants on BGM and Calu-3 cell**

290 **lines.** SARS-CoV-2 strains were inoculated on confluent BGM and Calu-3 cells at an MOI of  $10^{-3}$  and  
291 then incubated at 36°C with 5% CO<sub>2</sub> for 7 days. Supernatant samples were collected at regular  
292 intervals, for which viral particle quantification was performed by qRT-PCR. Each data point is the  
293 average of three replicates, with standard deviation as error bars. Statistical analysis was performed  
294 by two-way ANOVA with Tukey multiple comparisons between both factors of comparison (virus strain  
295 and cell line) on GraphPad Prism (software version 8.4.3).

296

297

298 **References**

- 299 1. Guo G, Ye L, Pan K, Chen Y, Xing D, Yan K, Chen Z, Ding N, Li W, Huang H, Zhang L, Li X,  
300 Xue X. 2020. New Insights of Emerging SARS-CoV-2: Epidemiology, Etiology, Clinical Features,  
301 Clinical Treatment, and Prevention. *Front Cell Dev Biol* 8.
- 302 2. Srivastava N, Baxi P, Ratho RK, Saxena SK. 2020. Global Trends in Epidemiology of  
303 Coronavirus Disease 2019 (COVID-19). *Coronavirus Dis 2019 COVID-19* 9–21.
- 304 3. Corman VM, Landt O, Kaiser M, Molenkamp R, Meijer A, Chu DK, Bleicker T, Brünink S,  
305 Schneider J, Schmidt ML, Mulders DG, Haagmans BL, van der Veer B, van den Brink S,  
306 Wijsman L, Goderski G, Romette J-L, Ellis J, Zambon M, Peiris M, Goossens H, Reusken C,  
307 Koopmans MP, Drosten C. 2020. Detection of 2019 novel coronavirus (2019-nCoV) by real-time  
308 RT-PCR. *Eurosurveillance* 25.
- 309 4. Diseases KS of I, Diseases KS of PI, Epidemiology KS of, Therapy KS for A, Prevention KS for  
310 HIC and, Prevention KC for DC and. 2020. Report on the Epidemiological Features of  
311 Coronavirus Disease 2019 (COVID-19) Outbreak in the Republic of Korea from January 19 to  
312 March 2, 2020. *J Korean Med Sci* 35.
- 313 5. Lee VJ, Chiew CJ, Khong WX. 2020. Interrupting transmission of COVID-19: lessons from  
314 containment efforts in Singapore. *J Travel Med* 27.
- 315 6. Etievant S, Bal A, Escuret V, Brengel-Pesce K, Bouscambert M, Cheynet V, Generenaz L, Oriol  
316 G, Destras G, Billaud G, Josset L, Frobert E, Morfin F, Gaymard A. 2020. Performance  
317 Assessment of SARS-CoV-2 PCR Assays Developed by WHO Referral Laboratories. 6. *J Clin*  
318 *Med* 9:1871.
- 319 7. Huang C, Wang Y, Li X, Ren L, Zhao J, Hu Y, Zhang L, Fan G, Xu J, Gu X, Cheng Z, Yu T, Xia  
320 J, Wei Y, Wu W, Xie X, Yin W, Li H, Liu M, Xiao Y, Gao H, Guo L, Xie J, Wang G, Jiang R, Gao  
321 Z, Jin Q, Wang J, Cao B. 2020. Clinical features of patients infected with 2019 novel coronavirus  
322 in Wuhan, China. *The Lancet* 395:497–506.
- 323 8. Lescure F-X, Bouadma L, Nguyen D, Parisey M, Wicky P-H, Behillil S, Gaymard A,  
324 Bouscambert-Duchamp M, Donati F, Hingrat QL, Enouf V, Houhou-Fidouh N, Valette M, Mailles

- 325 A, Lucet J-C, Mentre F, Duval X, Descamps D, Malvy D, Timsit J-F, Lina B, van-der-Werf S,  
326 Yazdanpanah Y. 2020. Clinical and virological data of the first cases of COVID-19 in Europe: a  
327 case series. *Lancet Infect Dis* 0.
- 328 9. El-Aziz TMA, Stockand JD. 2020. Recent progress and challenges in drug development against  
329 COVID-19 coronavirus (SARS-CoV-2) - an update on the status. *Infect Genet Evol*  
330 <https://doi.org/10.1016/j.meegid.2020.104327>.
- 331 10. Yang H-C, Chen C, Wang J-H, Liao H-C, Yang C-T, Chen C-W, Lin Y-C, Kao C-H, Liao JC.  
332 2020. Genomic, geographic and temporal distributions of SARS-CoV-2 mutations. *bioRxiv*  
333 2020.04.22.055863.
- 334 11. Gámbaro F, Behillil S, Baidaliuk A, Donati F, Albert M, Alexandru A, Vanpeene M, Bizard M,  
335 Brisebarre A, Barbet M, Derrar F, Werf S van der, Enouf V, Simon-Loriere E. 2020.  
336 Introductions and early spread of SARS-CoV-2 in France, 24 January to 23 March 2020.  
337 *Eurosurveillance* 25:2001200.
- 338 12. Baillie GJ, Galiano M, Agapow P-M, Myers R, Chiam R, Gall A, Palser AL, Watson SJ, Hedge J,  
339 Underwood A, Platt S, McLean E, Pebody RG, Rambaut A, Green J, Daniels R, Pybus OG,  
340 Kellam P, Zambon M. 2012. Evolutionary Dynamics of Local Pandemic H1N1/2009 Influenza  
341 Virus Lineages Revealed by Whole-Genome Analysis. *J Virol* 86:11–18.
- 342 13. Poon LLM, Song T, Rosenfeld R, Lin X, Rogers MB, Zhou B, Sebra R, Halpin RA, Guan Y,  
343 Twaddle A, DePasse JV, Stockwell TB, Wentworth DE, Holmes EC, Greenbaum B, Peiris JSM,  
344 Cowling BJ, Ghedin E. 2016. Quantifying influenza virus diversity and transmission in humans.  
345 *Nat Genet* 48:195–200.
- 346 14. Korber B, Fischer WM, Gnanakaran S, Yoon H, Theiler J, Abfalterer W, Hengartner N, Giorgi  
347 EE, Bhattacharya T, Foley B, Hastie KM, Parker MD, Partridge DG, Evans CM, Freeman TM,  
348 de Silva TI, Angyal A, Brown RL, Carrilero L, Green LR, Groves DC, Johnson KJ, Keeley AJ,  
349 Lindsey BB, Parsons PJ, Raza M, Rowland-Jones S, Smith N, Tucker RM, Wang D, Wyles MD,  
350 McDanal C, Perez LG, Tang H, Moon-Walker A, Whelan SP, LaBranche CC, Sapphire EO,

- 351 Montefiori DC. 2020. Tracking Changes in SARS-CoV-2 Spike: Evidence that D614G Increases  
352 Infectivity of the COVID-19 Virus. *Cell* <https://doi.org/10.1016/j.cell.2020.06.043>.
- 353 15. Zhang L, Jackson CB, Mou H, Ojha A, Rangarajan ES, Izard T, Farzan M, Choe H. 2020. The  
354 D614G mutation in the SARS-CoV-2 spike protein reduces S1 shedding and increases  
355 infectivity. *bioRxiv* 2020.06.12.148726.
- 356 16. Chiu RWK, Chim SSC, Tong Y, Fung KSC, Chan PKS, Zhao G, Lo YMD. 2005. Tracing SARS-  
357 Coronavirus Variant with Large Genomic Deletion. *Emerg Infect Dis* 11:168–170.
- 358 17. Muth D, Corman VM, Roth H, Binger T, Dijkman R, Gottula LT, Gloza-Rausch F, Balboni A,  
359 Battilani M, Rihtarič D, Toplak I, Ameneiros RS, Pfeifer A, Thiel V, Drexler JF, Müller MA,  
360 Drosten C. 2018. Attenuation of replication by a 29 nucleotide deletion in SARS-coronavirus  
361 acquired during the early stages of human-to-human transmission. *Sci Rep* 8.
- 362 18. Bal A, Destras G, Gaymard A, Bouscambert-Duchamp M, Valette M, Escuret V, Frobert E,  
363 Billaud G, Trouillet-Assant S, Cheynet V, Brengel-Pesce K, Morfin F, Lina B, Josset L. 2020.  
364 Molecular characterization of SARS-CoV-2 in the first COVID-19 cluster in France reveals an  
365 amino acid deletion in nsp2 (Asp268del). *Clin Microbiol Infect Off Publ Eur Soc Clin Microbiol*  
366 *Infect Dis* 26:960–962.
- 367 19. Su YCF, Anderson DE, Young BE, Linster M, Zhu F, Jayakumar J, Zhuang Y, Kalimuddin S,  
368 Low JGH, Tan CW, Chia WN, Mak TM, Octavia S, Chavatte J-M, Lee RTC, Pada S, Tan SY,  
369 Sun L, Yan GZ, Maurer-Stroh S, Mendenhall IH, Leo Y-S, Lye DC, Wang L-F, Smith GJD. 2020.  
370 Discovery and Genomic Characterization of a 382-Nucleotide Deletion in ORF7b and ORF8  
371 during the Early Evolution of SARS-CoV-2. *mBio* 11.
- 372 20. Holland LA, Kaelin EA, Maqsood R, Estifanos B, Wu LI, Varsani A, Halden RU, Hogue BG,  
373 Scotch M, Lim ES. 2020. An 81-Nucleotide Deletion in SARS-CoV-2 ORF7a Identified from  
374 Sentinel Surveillance in Arizona (January to March 2020). *J Virol* 94.
- 375 21. Pachetti M, Marini B, Benedetti F, Giudici F, Mauro E, Storici P, Masciovecchio C, Angeletti S,  
376 Ciccozzi M, Gallo RC, Zella D, Ippodrino R. 2020. Emerging SARS-CoV-2 mutation hot spots  
377 include a novel RNA-dependent-RNA polymerase variant. *J Transl Med* 18.

- 378 22. Batty EM, Kochakarn T, Panthan B, Kumpornsin K, Jiaranai P, Wangwiwatsin A, Kotanan N,  
379 Jaruampornpan P, Watthanachockchai T, Rakmanee K, Sensorn I, Sungkanuparph S,  
380 Pasomsub E, Chookajorn T, Chantratita W. 2020. Genomic surveillance of SARS-CoV-2 in  
381 Thailand reveals mixed imported populations, a local lineage expansion and a virus with  
382 truncated ORF7a. medRxiv 2020.05.22.20108498.
- 383 23. Riojas MA, Frank AM, Puthuveetil NP, Flores B, Parker M, King SP, Peiris M, Chu DKW, Benton  
384 B, Bradford R, Hazbón MH, Rashid S. 2020. A Rare Deletion in SARS-CoV-2 ORF6  
385 Dramatically Alters the Predicted Three-Dimensional Structure of the Resultant Protein. bioRxiv  
386 2020.06.09.134460.
- 387 24. Shi J, Sun J, Hu Y. 2020. Enteric involvement of SARS-CoV-2: Implications for the COVID-19  
388 management, transmission, and infection control. *Virulence* 11:941–944.
- 389 25. Jary A, Leducq V, Malet I, Marot S, Klement-Frutos E, Teyssou E, Soulié C, Abdi B, Wirden M,  
390 Pourcher V, Caumes E, Calvez V, Burrel S, Marcelin A-G, Boutolleau D. 2020. Evolution of viral  
391 quasispecies during SARS-CoV-2 infection. *Clin Microbiol Infect* 0.
- 392 26. Duchene S, Featherstone L, Haritopoulou-Sinanidou M, Rambaut A, Lemey P, Baele G. 2020.  
393 Temporal signal and the phylodynamic threshold of SARS-CoV-2. bioRxiv 2020.05.04.077735.
- 394 27. Day T, Gandon S, Lion S, Otto SP. 2020. On the evolutionary epidemiology of SARS-CoV-2.  
395 *Curr Biol* 30:R849–R857.
- 396 28. Keng C-T, Tan Y-J. 2009. Molecular and Biochemical Characterization of the SARS-CoV  
397 Accessory Proteins ORF8a, ORF8b and ORF8ab. *Mol Biol SARS-Coronavirus* 177–191.
- 398 29. Liu W, Tang F, Fontanet A, Zhan L, Wang T-B, Zhang P-H, Luan Y-H, Cao C-Y, Zhao Q-M, Wu  
399 X-M, Xin Z-T, Zuo S-Q, Baril L, Vabret A, Shao Y-M, Yang H, Cao W-C. 2005. Molecular  
400 Epidemiology of SARS-associated Coronavirus, Beijing. *Emerg Infect Dis* 11:1420–1424.
- 401 30. Zhao G. 2007. SARS molecular epidemiology: a Chinese fairy tale of controlling an emerging  
402 zoonotic disease in the genomics era. *Philos Trans R Soc B Biol Sci* 362:1063–1081.

- 403 31. McHardy AC, Adams B. 2009. The Role of Genomics in Tracking the Evolution of Influenza A  
404 Virus. *PLOS Pathog* 5:e1000566.
- 405 32. Oude Munnink BB, Nieuwenhuijse DF, Stein M, O'Toole Á, Haverkate M, Mollers M, Kamga SK,  
406 Schapendonk C, Pronk M, Lexmond P, van der Linden A, Bestebroer T, Chestakova I,  
407 Overmars RJ, van Nieuwkoop S, Molenkamp R, van der Eijk AA, GeurtsvanKessel C, Vennema  
408 H, Meijer A, Rambaut A, van Dissel J, Sikkema RS, Timen A, Koopmans M. 2020. Rapid SARS-  
409 CoV-2 whole-genome sequencing and analysis for informed public health decision-making in  
410 the Netherlands. *Nat Med* 1–6.
- 411 33. Trouillet-Assant S, Viel S, Gaymard A, Pons S, Richard J-C, Perret M, Villard M, Brengel-Pesce  
412 K, Lina B, Mezidi M, Bitker L, Belot A. 2020. Type I IFN immunoprofiling in COVID-19 patients. *J*  
413 *Allergy Clin Immunol* 146:206-208.e2.
- 414 34. Gunalan V, Mirazimi A, Tan Y-J. 2011. A putative diacidic motif in the SARS-CoV ORF6 protein  
415 influences its subcellular localization and suppression of expression of co-transfected  
416 expression constructs. *BMC Res Notes* 4:446.
- 417 35. Kopecky-Bromberg SA, Martínez-Sobrido L, Frieman M, Baric RA, Palese P. 2007. Severe  
418 acute respiratory syndrome coronavirus open reading frame (ORF) 3b, ORF 6, and  
419 nucleocapsid proteins function as interferon antagonists. *J Virol* 81:548–557.
- 420 36. Geng H, Liu Y-M, Chan W-S, Lo AW-I, Au DM-Y, Waye MM-Y, Ho Y-Y. 2005. The putative  
421 protein 6 of the severe acute respiratory syndrome-associated coronavirus: expression and  
422 functional characterization. *FEBS Lett* 579:6763–6768.
- 423 37. Li J-Y, Liao C-H, Wang Q, Tan Y-J, Luo R, Qiu Y, Ge X-Y. 2020. The ORF6, ORF8 and  
424 nucleocapsid proteins of SARS-CoV-2 inhibit type I interferon signaling pathway. *Virus Res*  
425 286:198074.
- 426 38. Plant EP, Sims AC, Baric RS, Dinman JD, Taylor DR. 2013. Altering SARS Coronavirus  
427 Frameshift Efficiency Affects Genomic and Subgenomic RNA Production. *Viruses* 5:279–294.



- 428 39. Irigoyen N, Firth AE, Jones JD, Chung BY-W, Siddell SG, Brierley I. 2016. High-Resolution  
429 Analysis of Coronavirus Gene Expression by RNA Sequencing and Ribosome Profiling. PLOS  
430 Pathog 12:e1005473.
- 431 40. Baranov PV, Henderson CM, Anderson CB, Gesteland RF, Atkins JF, Howard MT. 2005.  
432 Programmed ribosomal frameshifting in decoding the SARS-CoV genome. Virology 332:498–  
433 510.
- 434 41. Dinman JD. 2009. Programmed –1 Ribosomal Frameshifting in SARS Coronavirus. Mol Biol  
435 SARS-Coronavirus 63–72.
- 436 42. Chang C, Hou M-H, Chang C-F, Hsiao C-D, Huang T. 2014. The SARS coronavirus  
437 nucleocapsid protein – Forms and functions. Antiviral Res 103:39–50.
- 438 43. McBride R, van Zyl M, Fielding BC. 2014. The Coronavirus Nucleocapsid Is a Multifunctional  
439 Protein. Viruses 6:2991–3018.
- 440 44. Charre C, Givevra C, Sabatier M, Regue H, Destras G, Brun S, Burfin G, Scholtes C, Morfin F,  
441 Valette M, Lina B, Bal A, Josset L. Evaluation of NGS-based approaches for SARS-CoV-2  
442 whole genome characterisation | bioRxiv.
- 443 45. R Core Team. 2013. R: A language and environment for statistical computing. R Computing  
444 Foundation for Statistical Computing.
- 445 46. Singer JB, Thomson EC, McLauchlan J, Hughes J, Gifford RJ. 2018. GLUE: a flexible software  
446 system for virus sequence data. BMC Bioinformatics 19.
- 447 47. Organization WH. 2020. Laboratory biosafety guidance related to coronavirus disease (COVID-  
448 19): interim guidance, 13 May 2020. WHO/WPE/GIH/2020.3.

449

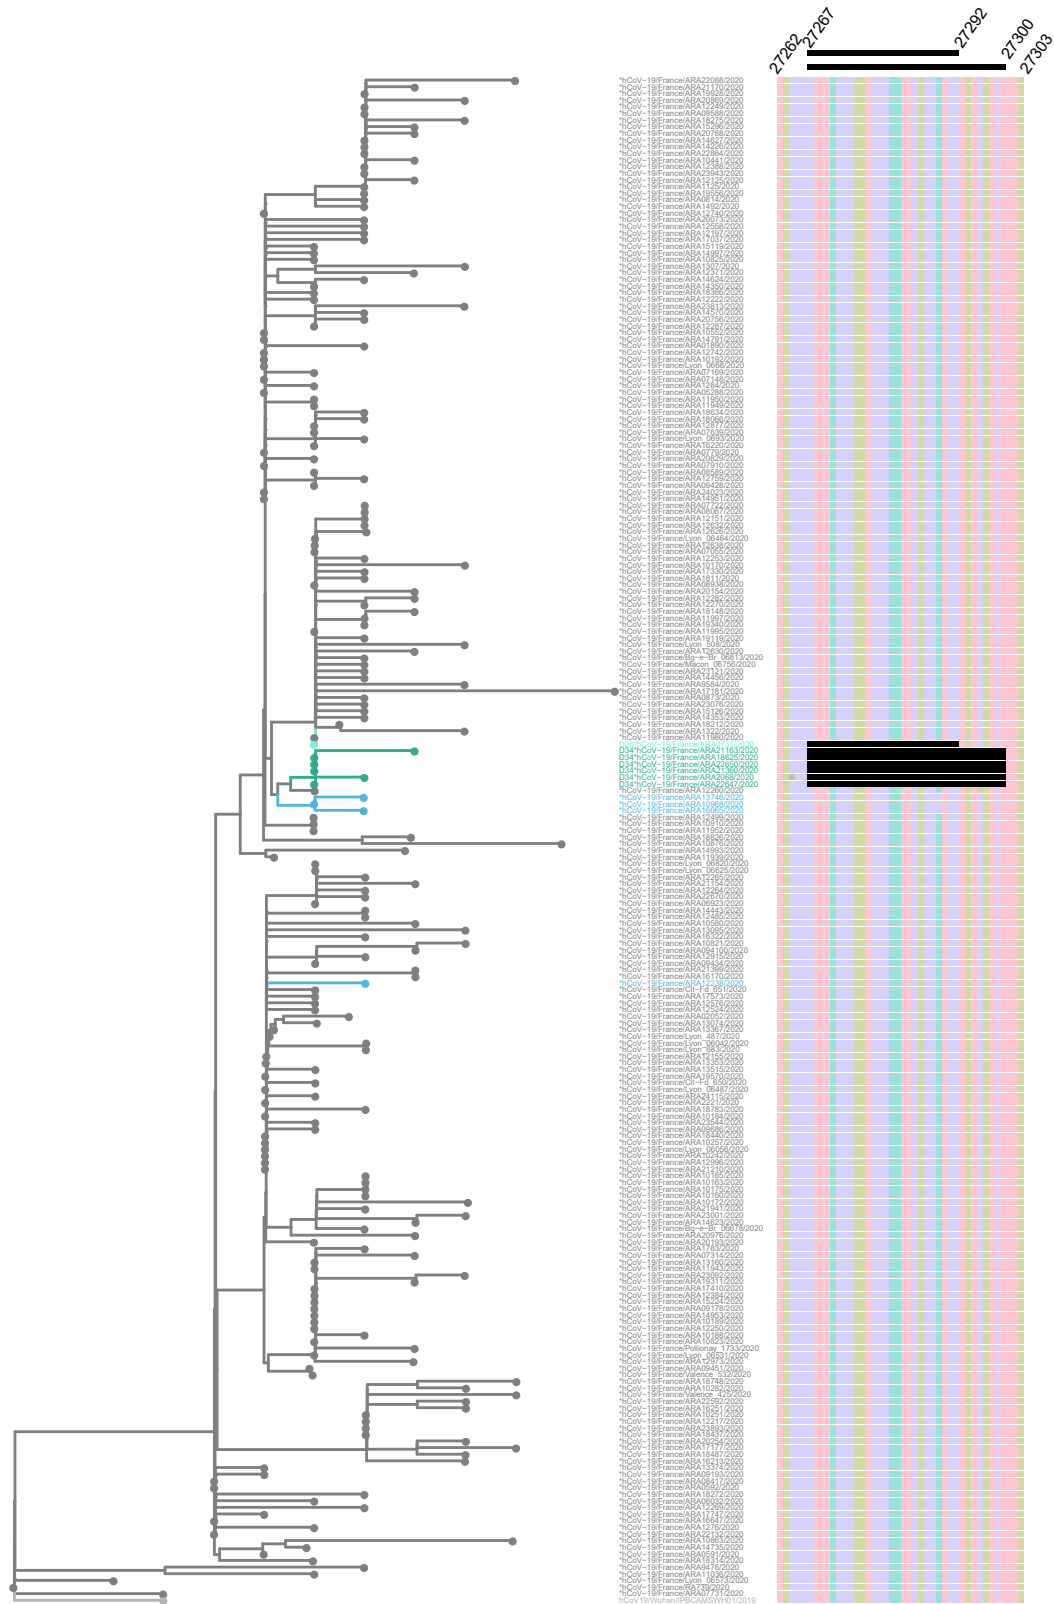

27267 27267  
 27292 27292  
 27300 27300  
 27303 27303

Nucleotide

- 
- a
- c
- g
- n
- t

Origin and ORF6 mutation

- GRU3
- GRU3 and ORF6 34-nt deletion variant
- ORF6 26-nt deletion variant
- Other Hospital Units in ARA

4e-05

Wuhan-Hu-1

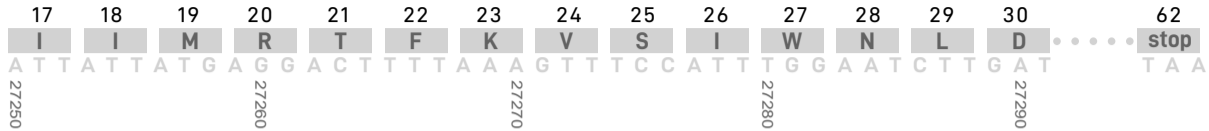

D34

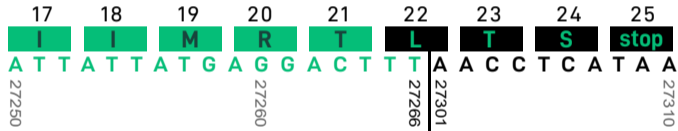

D26

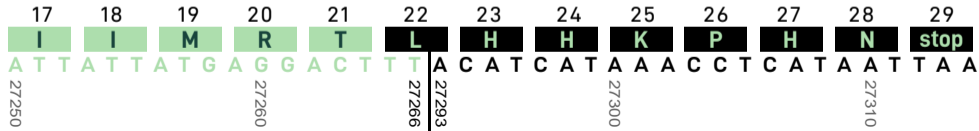



**TABLE 1. Clinical data from patients infected with the ORF6 deletion variants compared with related patients infected with WT SARS-CoV-2 strains**

|                                          | Patient #68                        | Patient #38   | Patient #46   | Patient #65                          | Patient #25                          | Patient #8                                    | HCW#63        | Patient #60                          | Patient #47                                   | Patient #50                 |
|------------------------------------------|------------------------------------|---------------|---------------|--------------------------------------|--------------------------------------|-----------------------------------------------|---------------|--------------------------------------|-----------------------------------------------|-----------------------------|
| <b>Sequence name<sup>a</sup></b>         | ARA10968/2020                      | ARA12238/2020 | ARA13746/2020 | ARA16665/2020                        | ARA18625/2020                        | ARA2608/2020                                  | ARA21163/2020 | ARA21360/2020                        | ARA22647/2020                                 | ARA22650/2020               |
| <b>Age (years)</b>                       | 89                                 | 78            | 84            | 89                                   | 97                                   | 82                                            | 31            | 94                                   | 81                                            | 85                          |
| <b>Sex</b>                               | F                                  | M             | F             | F                                    | M                                    | F                                             | F             | F                                    | M                                             | F                           |
| <b>Comorbidities</b>                     | Hypertension                       | None          | None          | Cardiovascular disease, Hypertension | Cardiovascular disease, Hypertension | Cardiovascular disease, Hypertension, Obesity | NA            | Cardiovascular disease, Hypertension | None                                          | Cardiovascular disease      |
| <b>Respiratory manifestations</b>        | URTI                               | LRTI          | LRTI          | Asymptomatic                         | Asymptomatic                         | LRTI                                          | URTI          | URTI                                 | Not specified                                 | LRTI                        |
| <b>Hospitalization (Yes / No)</b>        | Yes                                | Yes           | Yes           | Yes                                  | Yes                                  | Yes                                           | No            | Yes                                  | Yes                                           | Yes                         |
| <b>Hospitalization Unit</b>              | GRU-3                              | GRU-3         | GRU-3         | GRU-3                                | GRU-3                                | GRU-3                                         | GRU-3         | GRU-3                                | GRU-3                                         | GRU-3                       |
| <b>ORF6 deletion</b>                     | None                               | None          | None          | None                                 | D34                                  | D34                                           | D34           | D34                                  | D34                                           | D34                         |
| <b>Date of diagnostic</b>                | 2020/03/18                         | 2020/03/22    | 2020/03/25    | 2020/03/30                           | 2020/04/02                           | 2020/04/06                                    | 2020/04/07    | 2020/04/07                           | 2020/04/09                                    | 2020/04/09                  |
| <b>Duration of excretion<sup>b</sup></b> | Respiratory sample positive at D21 | Not monitored | Not monitored | Respiratory sample positive at D14   | Not monitored                        | Not monitored                                 | Not monitored | Not monitored                        | Respiratory and stool samples positive at D14 | Not monitored               |
| <b>Outcome<sup>b</sup></b>               | Favorable                          | Favorable     | Favorable     | Favorable                            | Deceased, unrelated to COVID-19 (D5) | Deceased from COVID-19 (D6)                   | Favorable     | Favorable                            | Favorable                                     | Deceased from COVID-19 (D9) |

HCW=health care worker; COPD=chronic obstructive pulmonary disease; URTI: Upper Respiratory Tract Infection; LRTI: Lower Respiratory Tract Infection; HCL=Hospices Civils de Lyon; GRU-1=geriatric rehabilitation unit within HCL; D26=26-nt deletion; D34=34-nt deletion; D=Day

<sup>a</sup> Sequence names in the table are preceded by hCoV-19/France/; example: hCoV-19/France/ARA0731/2020

<sup>b</sup> Duration of excretion and death are calculated from the date of diagnosis

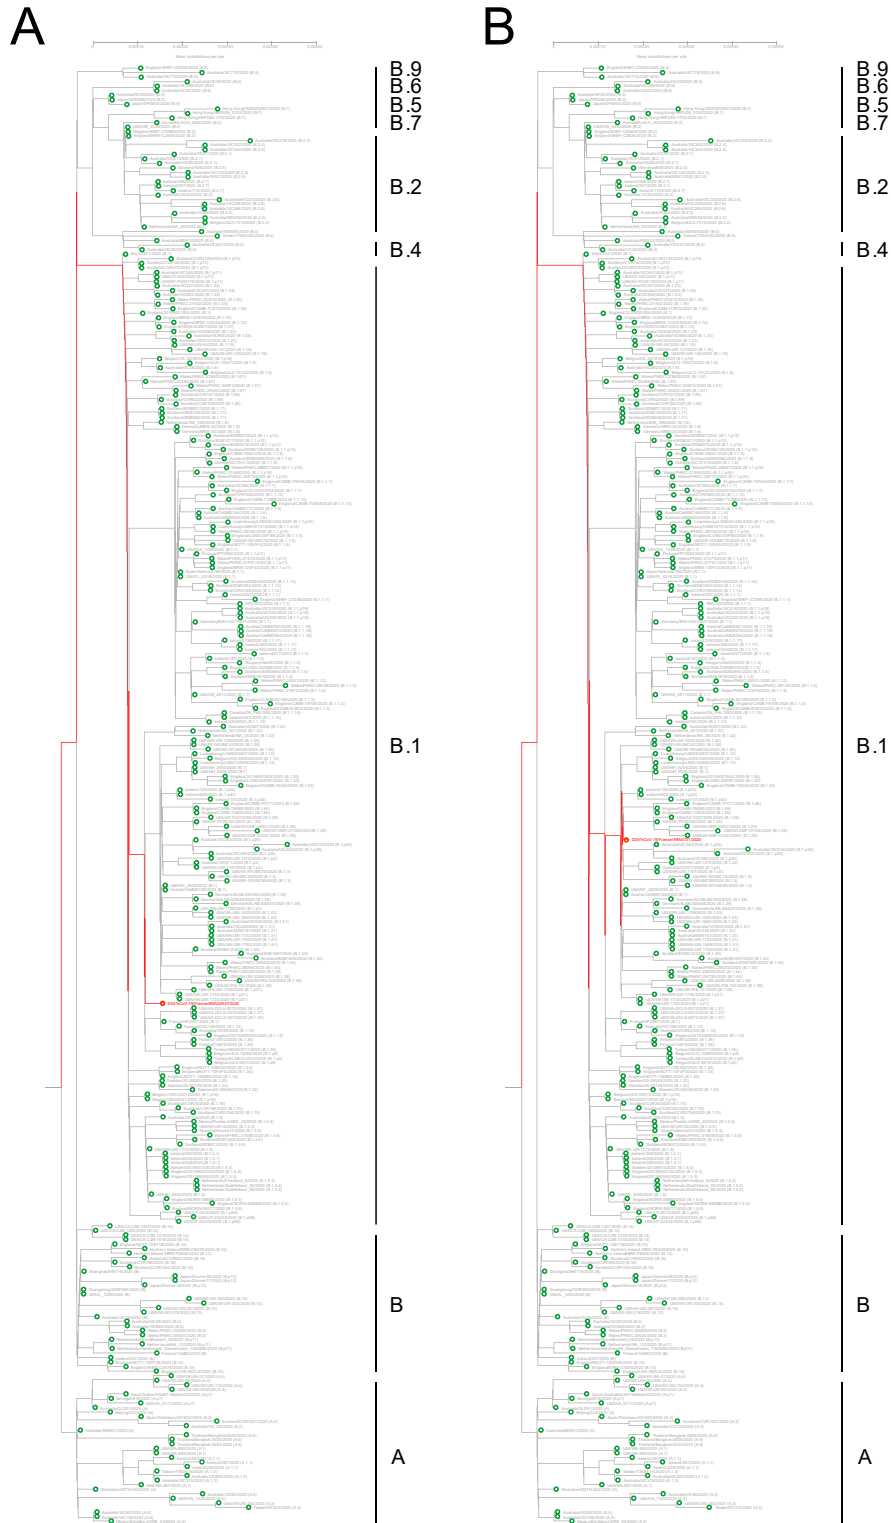

**SUPPLEMENTARY FIGURE 1. CoV-GLUE phylogenomic placement map.** The D34 (A) and D26 (B) deletions are phylogenetically positioned against global SARS-CoV-2 sequences deposited on the GISAID database and annotated with PANGOLIN lineages. The tree was generated by the CoV-GLUE resource, which uses the RAxML (Randomized Axelerated Maximum Likelihood) software (Stamatakis 2014). Relevant deletions are in red, while WT sequences are in green.

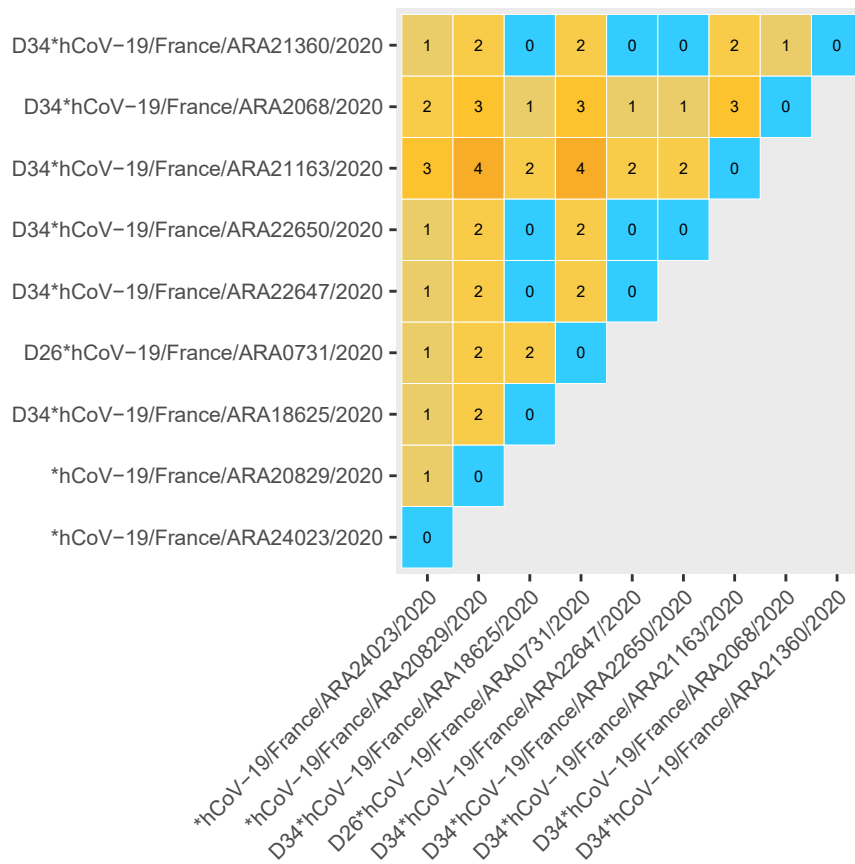

**SUPPLEMENTARY FIGURE 2. Single nucleotide polymorphism heat map of SARS-CoV-2 ORF6 WT and deletion strains.** Mismatch count between consensus sequences generated by each method compared 2 by 2 for each sample. Blue tiles correspond to perfect identity and orange tiles correspond to mismatches (number of mismatches is indicated inside the tile). Matrices were generated with an R script using Decipher (alignment), ape (distance matrices) and ggplot2 (charts) libraries. Of note, undetermined bases and deletions were not considered in the calculation of mismatches.

**SUPPLEMENTARY TABLE 1. SARS-CoV-2 genomes sequenced in the Auvergne-Rhône-Alpes region from Feb 12 to Apr 12, 2020**

| <i>Virus name</i>                         | <i>Accession ID</i> | <i>Collection date</i> | <i>Location</i>                          | <i>Host</i> | <i>Gender</i> | <i>Age</i> | <i>Passage</i> | <i>Specimen</i>     | <i>Lineage Clade</i> |    |
|-------------------------------------------|---------------------|------------------------|------------------------------------------|-------------|---------------|------------|----------------|---------------------|----------------------|----|
| hCoV-19/France/RA739/2020                 | EPI_ISL_410486      | 2/8/2020               | Europe / France / ARA / Contamines       | Human       | Female        | 56         | Original       | Oro-pharyngeal swab | B                    | L  |
| hCoV-19/France/Pollionay_1733/2020        | EPI_ISL_416745      | 3/10/2020              | Europe / France / ARA / Pollionay        | Human       | Male          | 81         | Original       | Nasopharyngeal swab | B.1                  | G  |
| hCoV-19/France/Valence_425/2020           | EPI_ISL_416746      | 3/3/2020               | Europe / France / ARA / Valence          | Human       | Male          | 61         | Original       | Nasopharyngeal swab | B.1.1                | GR |
| hCoV-19/France/Lyon_487/2020              | EPI_ISL_416747      | 3/4/2020               | Europe / France / ARA / Lyon             | Human       | Female        | 43         | Original       | Nasopharyngeal swab | B.1                  | G  |
| hCoV-19/France/Lyon_508/2020              | EPI_ISL_416748      | 3/4/2020               | Europe / France / ARA / Lyon             | Human       | Female        | 50         | Original       | Nasopharyngeal swab | B.1                  | GH |
| hCoV-19/France/Valence_532/2020           | EPI_ISL_416749      | 3/4/2020               | Europe / France / ARA / Valence          | Human       | Female        | 44         | Original       | Nasopharyngeal swab | B.1                  | G  |
| hCoV-19/France/Lyon_683/2020              | EPI_ISL_416750      | 3/6/2020               | Europe / France / ARA / Lyon             | Human       | Male          | 47         | Original       | Nasopharyngeal swab | B.1                  | G  |
| hCoV-19/France/Clermont-Ferrand_651/2020  | EPI_ISL_416751      | 3/5/2020               | Europe / France / ARA / Clermont-Ferrand | Human       | Male          | 16         | Original       | Nasopharyngeal swab | B.1                  | G  |
| hCoV-19/France/Clermont-Ferrand_650/2020  | EPI_ISL_416752      | 3/4/2020               | Europe / France / ARA / Clermont-Ferrand | Human       | Female        | 49         | Original       | Nasopharyngeal swab | B.1                  | G  |
| hCoV-19/France/Lyon_06464 /2020           | EPI_ISL_416753      | 3/6/2020               | Europe / France / ARA / Lyon             | Human       | Male          | 50         | Original       | Nasopharyngeal swab | B.1                  | GH |
| hCoV-19/France/Lyon_06487/2020            | EPI_ISL_416754      | 3/6/2020               | Europe / France / ARA / Lyon             | Human       | Male          | 82         | Original       | Nasopharyngeal swab | B.1                  | G  |
| hCoV-19/France/Lyon_06531/2020            | EPI_ISL_416756      | 3/6/2020               | Europe / France / ARA / Lyon             | Human       | Female        | 88         | Original       | Nasopharyngeal swab | B.1                  | G  |
| hCoV-19/France/Bourg-en-Bresse_06678/2020 | EPI_ISL_416757      | 3/7/2020               | Europe / France / ARA / Bourg-en-Bresse  | Human       | Male          | 41         | Original       |                     | B.1                  | G  |
| hCoV-19/France/Lyon_0693/2020             | EPI_ISL_416758      | 3/8/2020               | Europe / France / ARA / Lyon             | Human       | Male          | 79         | Original       | Nasopharyngeal swab | B.1                  | GH |
| hCoV-19/France/Lyon_06042/2020            | EPI_ISL_417333      | 3/4/2020               | Europe / France / ARA / Lyon             | Human       | Male          | 48         | Original       | Nasopharyngeal swab | B.1                  | G  |
| hCoV-19/France/Lyon_06056/2020            | EPI_ISL_417334      | 3/4/2020               | Europe / France / ARA / Lyon             | Human       | Female        | 50         | Original       | Nasopharyngeal swab | B.1                  | G  |
| hCoV-19/France/Lyon_06573/2020            | EPI_ISL_417335      | 3/6/2020               | Europe / France / ARA / Lyon             | Human       | Male          | 74         | Original       | Nasopharyngeal swab | B                    | L  |
| hCoV-19/France/Lyon_0668/2020             | EPI_ISL_417336      | 3/6/2020               | Europe / France / ARA / Lyon             | Human       | Male          | 79         | Original       | Nasopharyngeal swab | B.1                  | GH |
| hCoV-19/France/Lyon_06625/2020            | EPI_ISL_417337      | 3/7/2020               | Europe / France / ARA / Lyon             | Human       | Male          | 78         | Original       | Nasopharyngeal swab | B.1                  | G  |
| hCoV-19/France/Macon_06756/2020           | EPI_ISL_417338      | 3/7/2020               | Europe / France / ARA / Macon            | Human       | Female        | 63         | Original       | Nasopharyngeal swab | B.1                  | GH |
| hCoV-19/France/Lyon_06820/2020            | EPI_ISL_417339      | 3/8/2020               | Europe / France / ARA / Lyon             | Human       | Female        | 86         | Original       | Nasopharyngeal swab | B.1                  | G  |
| hCoV-19/France/Bourg-en-Bresse_06813/2020 | EPI_ISL_417340      | 3/7/2020               | Europe / France / ARA / Bourg-en-Bresse  | Human       | Male          | 53         | Original       | Nasopharyngeal swab | B.1                  | GH |
| hCoV-19/France/ARA094100/2020             | EPI_ISL_418412      | 3/15/2020              | Europe / France / ARA / Privas           | Human       | Female        | 55         | Original       | Nasopharyngeal swab | B.1                  | G  |
| hCoV-19/France/ARA09428/2020              | EPI_ISL_418413      | 3/15/2020              | Europe / France / ARA / Macon            | Human       | Female        | 80         | Original       | Nasopharyngeal swab | B.1                  | GH |
| hCoV-19/France/ARA09434/2020              | EPI_ISL_418414      | 3/15/2020              | Europe / France / ARA / Valence          | Human       | Female        | 84         | Original       | Nasopharyngeal swab | B.1                  | G  |
| hCoV-19/France/ARA09451/2020              | EPI_ISL_418415      | 3/15/2020              | Europe / France / ARA / Valence          | Human       | Female        | 93         | Original       | Nasopharyngeal swab | B.1                  | G  |
| hCoV-19/France/ARA09588/2020              | EPI_ISL_418416      | 3/16/2020              | Europe / France / ARA / Venissieux       | Human       | Female        | 41         | Original       | Nasopharyngeal swab | B.1                  | GH |
| hCoV-19/France/ARA09686/2020              | EPI_ISL_418417      | 3/16/2020              | Europe / France / ARA / Valence          | Human       | Male          | 61         | Original       | Nasopharyngeal swab | B.1                  | G  |
| hCoV-19/France/ARA10163/2020              | EPI_ISL_418418      | 3/16/2020              | Europe / France / ARA / Lyon             | Human       | Female        | 58         | Original       | Nasopharyngeal swab | B.1                  | G  |
| hCoV-19/France/ARA10165/2020              | EPI_ISL_418419      | 3/16/2020              | Europe / France / ARA / Lyon             | Human       | Male          | 30         | Original       | Nasopharyngeal swab | B.1                  | G  |
| hCoV-19/France/ARA10170/2020              | EPI_ISL_418420      | 3/17/2020              | Europe / France / ARA / Lyon             | Human       | Female        | 40         | Original       | Nasopharyngeal swab | B.1                  | GH |
| hCoV-19/France/ARA10172/2020              | EPI_ISL_418421      | 3/17/2020              | Europe / France / ARA / Lyon             | Human       | Female        | 43         | Original       | Nasopharyngeal swab | B.1                  | G  |
| hCoV-19/France/ARA10184/2020              | EPI_ISL_418422      | 3/17/2020              | Europe / France / ARA / Lyon             | Human       | Female        | 76         | Original       | Nasopharyngeal swab | B.1                  | G  |
| hCoV-19/France/ARA10188/2020              | EPI_ISL_418423      | 3/17/2020              | Europe / France / ARA / Lyon             | Human       | Female        | 73         | Original       | Nasopharyngeal swab | B.1                  | G  |
| hCoV-19/France/ARA10189/2020              | EPI_ISL_418424      | 3/17/2020              | Europe / France / ARA / Lyon             | Human       | Female        | 79         | Original       | Nasopharyngeal swab | B.1                  | G  |



|                              |                |           |                                         |              |    |          |                         |       |    |
|------------------------------|----------------|-----------|-----------------------------------------|--------------|----|----------|-------------------------|-------|----|
| hCoV-19/France/ARA10192/2020 | EPI_ISL_418425 | 3/17/2020 | Europe / France / ARA / Lyon            | Human Female | 82 | Original | Nasopharyngeal swab     | B.1   | GH |
| hCoV-19/France/ARA10251/2020 | EPI_ISL_418426 | 3/17/2020 | Europe / France / ARA / Bourg-en-Bresse | Human Male   | 61 | Original | Nasopharyngeal swab     | B.1.1 | GR |
| hCoV-19/France/ARA10257/2020 | EPI_ISL_418427 | 3/17/2020 | Europe / France / ARA / Saint-Priest    | Human Female | 56 | Original | Nasopharyngeal swab     | B.1   | G  |
| hCoV-19/France/ARA10282/2020 | EPI_ISL_418428 | 3/17/2020 | Europe / France / ARA / Vienne          | Human Male   | NA | Original | Nasopharyngeal swab     | B.1.1 | GR |
| hCoV-19/France/ARA10876/2020 | EPI_ISL_418429 | 3/18/2020 | Europe / France / ARA / Lyon            | Human Female | 61 | Original | Nasopharyngeal swab     | B.1   | GH |
| hCoV-19/France/ARA10910/2020 | EPI_ISL_418430 | 3/18/2020 | Europe / France / ARA / Lyon            | Human Female | 85 | Original | Nasopharyngeal swab     | B.1   | GH |
| hCoV-19/France/ARA10968/2020 | EPI_ISL_418431 | 3/18/2020 | Europe / France / ARA / Lyon            | Human Female | 90 | Original | Nasopharyngeal swab     | B.1   | GH |
| hCoV-19/France/ARA11036/2020 | EPI_ISL_418432 | 3/18/2020 | Europe / France / ARA / Lyon            | Human Male   | 60 | Original | Nasopharyngeal swab     | B.2   | V  |
| hCoV-19/France/ARA10552/2020 | EPI_ISL_419168 | 3/17/2020 | Europe / France / ARA / Valence         | Human Male   | 0  | Original | Nasopharyngeal aspirate | B.1   | GH |
| hCoV-19/France/ARA11939/2020 | EPI_ISL_419169 | 3/21/2020 | Europe / France / ARA / Lyon            | Human Female | 42 | Original | Nasopharyngeal swab     | B.1   | GH |
| hCoV-19/France/ARA11943/2020 | EPI_ISL_419170 | 3/21/2020 | Europe / France / ARA / Lyon            | Human Female | 31 | Original | Nasopharyngeal swab     | B.1   | G  |
| hCoV-19/France/ARA11949/2020 | EPI_ISL_419171 | 3/21/2020 | Europe / France / ARA / Lyon            | Human Male   | 60 | Original | Nasopharyngeal swab     | B.1   | GH |
| hCoV-19/France/ARA11950/2020 | EPI_ISL_419172 | 3/21/2020 | Europe / France / ARA / Lyon            | Human Male   | 67 | Original | Nasopharyngeal swab     | B.1   | GH |
| hCoV-19/France/ARA11952/2020 | EPI_ISL_419173 | 3/21/2020 | Europe / France / ARA / Lyon            | Human Female | 44 | Original | Nasopharyngeal swab     | B.1   | GH |
| hCoV-19/France/ARA11980/2020 | EPI_ISL_419174 | 3/20/2020 | Europe / France / ARA / Macon           | Human Male   | 83 | Original | Nasopharyngeal swab     | B.1   | GH |
| hCoV-19/France/ARA11995/2020 | EPI_ISL_419175 | 3/21/2020 | Europe / France / ARA / Macon           | Human Male   | 85 | Original | Nasopharyngeal swab     | B.1   | GH |
| hCoV-19/France/ARA11997/2020 | EPI_ISL_419176 | 3/21/2020 | Europe / France / ARA / Macon           | Human Male   | 43 | Original | Nasopharyngeal aspirate | B.1   | GH |
| hCoV-19/France/ARA12125/2020 | EPI_ISL_419177 | 3/22/2020 | Europe / France / ARA / Lyon            | Human Female | 56 | Original | Nasopharyngeal swab     | B.1   | GH |
| hCoV-19/France/ARA12217/2020 | EPI_ISL_419178 | 3/22/2020 | Europe / France / ARA / Lyon            | Human Female | 52 | Original | Nasopharyngeal swab     | B.1.1 | GR |
| hCoV-19/France/ARA12222/2020 | EPI_ISL_419179 | 3/22/2020 | Europe / France / ARA / Lyon            | Human Male   | 88 | Original | Nasopharyngeal swab     | B.1   | GH |
| hCoV-19/France/ARA12238/2020 | EPI_ISL_419180 | 3/22/2020 | Europe / France / ARA / Lyon            | Human Male   | 78 | Original | Nasopharyngeal swab     | B.1   | G  |
| hCoV-19/France/ARA12249/2020 | EPI_ISL_419181 | 3/22/2020 | Europe / France / ARA / Lyon            | Human Female | 40 | Original | Nasopharyngeal swab     | B.1   | GH |
| hCoV-19/France/ARA12250/2020 | EPI_ISL_419182 | 3/22/2020 | Europe / France / ARA / Lyon            | Human Female | 54 | Original | Nasopharyngeal swab     | B.1   | G  |
| hCoV-19/France/ARA12253/2020 | EPI_ISL_419183 | 3/22/2020 | Europe / France / ARA / Bourg-en-Bresse | Human Male   | 86 | Original | Nasopharyngeal swab     | B.1   | GH |
| hCoV-19/France/ARA12260/2020 | EPI_ISL_419184 | 3/22/2020 | Europe / France / ARA / Lyon            | Human Male   | 73 | Original | Nasopharyngeal swab     | B.1   | GH |
| hCoV-19/France/ARA12264/2020 | EPI_ISL_419185 | 3/22/2020 | Europe / France / ARA / Bourg-en-Bresse | Human Female | 88 | Original | Nasopharyngeal swab     | B.1   | G  |
| hCoV-19/France/ARA12265/2020 | EPI_ISL_419186 | 3/22/2020 | Europe / France / ARA / Bourg-en-Bresse | Human Female | 96 | Original | Nasopharyngeal swab     | B.1   | G  |
| hCoV-19/France/ARA12269/2020 | EPI_ISL_419187 | 3/22/2020 | Europe / France / ARA / Macon           | Human Male   | 60 | Original | Nasopharyngeal aspirate | B.1   | G  |
| hCoV-19/France/ARA12270/2020 | EPI_ISL_419188 | 3/22/2020 | Europe / France / ARA / Macon           | Human Female | 53 | Original | Nasopharyngeal aspirate | B.1   | GH |
| hCoV-19/France/ARA12371/2020 | EPI_ISL_420604 | 3/23/2020 | Europe / France / ARA / Lyon            | Human Male   | 93 | Original | Nasopharyngeal swab     | B.1   | GH |
| hCoV-19/France/ARA12384/2020 | EPI_ISL_420605 | 3/22/2020 | Europe / France / ARA / Lyon            | Human Male   | 88 | Original | Nasopharyngeal swab     | B.1   | G  |
| hCoV-19/France/ARA12388/2020 | EPI_ISL_420606 | 3/22/2020 | Europe / France / ARA / Lyon            | Human Male   | 81 | Original | Nasopharyngeal swab     | B.1   | GH |
| hCoV-19/France/ARA12485/2020 | EPI_ISL_420607 | 3/23/2020 | Europe / France / ARA / Lyon            | Human Male   | 88 | Original | Nasopharyngeal swab     | B.1   | G  |
| hCoV-19/France/ARA12499/2020 | EPI_ISL_420608 | 3/23/2020 | Europe / France / ARA / Lyon            | Human Female | 85 | Original | Nasopharyngeal swab     | B.1   | GH |
| hCoV-19/France/ARA12524/2020 | EPI_ISL_420609 | 3/23/2020 | Europe / France / ARA / Lyon            | Human Female | 85 | Original | Nasopharyngeal swab     | B.1   | G  |
| hCoV-19/France/ARA12558/2020 | EPI_ISL_420610 | 3/23/2020 | Europe / France / ARA / Lyon            | Human Female | 85 | Original | Nasopharyngeal swab     | B.1   | GH |
| hCoV-19/France/ARA12576/2020 | EPI_ISL_420611 | 3/23/2020 | Europe / France / ARA / Lyon            | Human Male   | 26 | Original | Nasopharyngeal swab     | B.1   | G  |
| hCoV-19/France/ARA12626/2020 | EPI_ISL_420612 | 3/23/2020 | Europe / France / ARA / Macon           | Human Female | 58 | Original | Nasopharyngeal aspirate | B.1   | GH |

|                              |                |           |                                         |              |    |          |                         |        |    |
|------------------------------|----------------|-----------|-----------------------------------------|--------------|----|----------|-------------------------|--------|----|
| hCoV-19/France/ARA12630/2020 | EPI_ISL_420613 | 3/23/2020 | Europe / France / ARA / Macon           | Human Female | 47 | Original | Nasopharyngeal aspirate | B.1    | GH |
| hCoV-19/France/ARA12632/2020 | EPI_ISL_420614 | 3/23/2020 | Europe / France / ARA / Macon           | Human Female | 38 | Original | Nasopharyngeal aspirate | B.1    | GH |
| hCoV-19/France/ARA12759/2020 | EPI_ISL_420615 | 3/23/2020 | Europe / France / ARA / Lyon            | Human Male   | 84 | Original | Nasopharyngeal swab     | B.1    | GH |
| hCoV-19/France/ARA1284/2020  | EPI_ISL_420616 | 3/23/2020 | Europe / France / ARA / Lyon            | Human Female | 87 | Original | Nasopharyngeal aspirate | B.1    | GH |
| hCoV-19/France/ARA12877/2020 | EPI_ISL_420617 | 3/23/2020 | Europe / France / ARA / Lyon            | Human Male   | 28 | Original | Nasopharyngeal swab     | B.1    | GH |
| hCoV-19/France/ARA12915/2020 | EPI_ISL_420618 | 3/23/2020 | Europe / France / ARA / Lyon            | Human Male   | 71 | Original | Nasopharyngeal aspirate | B.1    | G  |
| hCoV-19/France/ARA12973/2020 | EPI_ISL_420619 | 3/23/2020 | Europe / France / ARA / Lyon            | Human Female | 87 | Original | Nasopharyngeal swab     | B.1    | G  |
| hCoV-19/France/ARA12996/2020 | EPI_ISL_420620 | 3/23/2020 | Europe / France / ARA / Bourg-en-Bresse | Human Female | 86 | Original | Nasopharyngeal swab     | B.1    | G  |
| hCoV-19/France/ARA1307/2020  | EPI_ISL_420621 | 3/24/2020 | Europe / France / ARA / Lyon            | Human Female | 23 | Original | Nasopharyngeal swab     | B.1    | GH |
| hCoV-19/France/ARA13074/2020 | EPI_ISL_420622 | 3/24/2020 | Europe / France / ARA / Lyon            | Human Male   | 59 | Original | Nasopharyngeal swab     | B.1    | G  |
| hCoV-19/France/ARA13095/2020 | EPI_ISL_420623 | 3/24/2020 | Europe / France / ARA / Lyon            | Human Male   | 66 | Original | Nasopharyngeal swab     | B.1    | G  |
| hCoV-19/France/ARA13160/2020 | EPI_ISL_420624 | 3/24/2020 | Europe / France / ARA / Lyon            | Human Female | 50 | Original | Nasopharyngeal swab     | B.1    | G  |
| hCoV-19/France/ARA1322/2020  | EPI_ISL_420625 | 3/24/2020 | Europe / France / ARA / Lyon            | Human Male   | 47 | Original | Nasopharyngeal swab     | B.1    | GH |
| hCoV-19/France/ARA01890/2020 | EPI_ISL_508871 | 3/18/2020 | Europe / France / ARA / Craponne        | Human Female | 50 | Original | Nasopharyngeal swab     | B.1    | GH |
| hCoV-19/France/ARA07639/2020 | EPI_ISL_508872 | 3/11/2020 | Europe / France / ARA / Lyon            | Human Female | 91 | Original | Nasopharyngeal swab     | B.1    | GH |
| hCoV-19/France/ARA07910/2020 | EPI_ISL_508873 | 3/12/2020 | Europe / France / ARA / Lyon            | Human Female | 85 | Original | Nasopharyngeal swab     | B.1    | GH |
| hCoV-19/France/ARA08589/2020 | EPI_ISL_508874 | 3/13/2020 | Europe / France / ARA / Lyon            | Human Female | 57 | Original | Nasopharyngeal swab     | B.1    | GH |
| hCoV-19/France/ARA0873/2020  | EPI_ISL_508875 | 3/14/2020 | Europe / France / ARA / Macon           | Human Female | 39 | Original | Nasopharyngeal swab     | B.1    | GH |
| hCoV-19/France/ARA08938/2020 | EPI_ISL_508876 | 3/14/2020 | Europe / France / ARA / Macon           | Human Male   | 58 | Original | Nasopharyngeal aspirate | B.1    | GH |
| hCoV-19/France/ARA09178/2020 | EPI_ISL_508877 | 3/15/2020 | Europe / France / ARA / Lyon            | Human Female | 49 | Original | Nasopharyngeal swab     | B.1    | G  |
| hCoV-19/France/ARA09193/2020 | EPI_ISL_508878 | 3/15/2020 | Europe / France / ARA / Venissieux      | Human Male   | 64 | Original | Nasopharyngeal swab     | B.1.11 | G  |
| hCoV-19/France/ARA10160/2020 | EPI_ISL_508879 | 3/16/2020 | Europe / France / ARA / Lyon            | Human Male   | 43 | Original | Nasopharyngeal aspirate | B.1    | G  |
| hCoV-19/France/ARA10175/2020 | EPI_ISL_508880 | 3/16/2020 | Europe / France / ARA / Lyon            | Human Male   | 58 | Original | Nasopharyngeal aspirate | B.1    | G  |
| hCoV-19/France/ARA10242/2020 | EPI_ISL_508881 | 3/16/2020 | Europe / France / ARA / Valence         | Human Female | 82 | Original | Nasopharyngeal aspirate | B.1    | G  |
| hCoV-19/France/ARA10823/2020 | EPI_ISL_508882 | 3/18/2020 | Europe / France / ARA / Lyon            | Human Female | 60 | Original | Nasopharyngeal swab     | B.1    | G  |
| hCoV-19/France/ARA10825/2020 | EPI_ISL_508883 | 3/18/2020 | Europe / France / ARA / Lyon            | Human Female | 29 | Original | Nasopharyngeal swab     | B.1    | GH |
| hCoV-19/France/ARA14226/2020 | EPI_ISL_508884 | 3/25/2020 | Europe / France / ARA / Lyon            | Human Male   | 88 | Original | Nasopharyngeal swab     | B.1    | GH |
| hCoV-19/France/ARA14350/2020 | EPI_ISL_508885 | 3/26/2020 | Europe / France / ARA / Lyon            | Human Female | 44 | Original | Nasopharyngeal swab     | B.1    | GH |
| hCoV-19/France/ARA14353/2020 | EPI_ISL_508886 | 3/24/2020 | Europe / France / ARA / Lyon            | Human Male   | 32 | Original | Nasopharyngeal swab     | B.1    | GH |
| hCoV-19/France/ARA14443/2020 | EPI_ISL_508887 | 3/26/2020 | Europe / France / ARA / Lyon            | Human Female | 46 | Original | Nasopharyngeal swab     | B.1    | G  |
| hCoV-19/France/ARA14456/2020 | EPI_ISL_508888 | 3/26/2020 | Europe / France / ARA / Lyon            | Human Male   | 26 | Original | Nasopharyngeal swab     | B.1    | GH |
| hCoV-19/France/ARA14570/2020 | EPI_ISL_508889 | 3/26/2020 | Europe / France / ARA / Lyon            | Human Male   | 50 | Original | Nasopharyngeal swab     | B.1    | GH |
| hCoV-19/France/ARA14623/2020 | EPI_ISL_508890 | 3/26/2020 | Europe / France / ARA / Lyon            | Human Male   | 72 | Original | Nasopharyngeal swab     | B.1    | G  |
| hCoV-19/France/ARA14624/2020 | EPI_ISL_508891 | 3/26/2020 | Europe / France / ARA / Lyon            | Human Female | 81 | Original | Nasopharyngeal swab     | B.1    | GH |
| hCoV-19/France/ARA14627/2020 | EPI_ISL_508892 | 3/26/2020 | Europe / France / ARA / Lyon            | Human Female | 52 | Original | Nasopharyngeal swab     | B.1    | GH |
| hCoV-19/France/ARA14735/2020 | EPI_ISL_508893 | 3/26/2020 | Europe / France / ARA / Lyon            | Human Male   | 91 | Original | Nasopharyngeal swab     | B.1    | G  |
| hCoV-19/France/ARA14791/2020 | EPI_ISL_508894 | 3/26/2020 | Europe / France / ARA / Lyon            | Human Male   | 73 | Original | Nasopharyngeal swab     | B.1    | GH |
| hCoV-19/France/ARA1492/2020  | EPI_ISL_508895 | 3/26/2020 | Europe / France / ARA / Lyon            | Human Female | 47 | Original | Nasopharyngeal swab     | B.1    | GH |

|                              |                |           |                                      |              |    |          |                         |         |    |
|------------------------------|----------------|-----------|--------------------------------------|--------------|----|----------|-------------------------|---------|----|
| hCoV-19/France/ARA14951/2020 | EPI_ISL_508896 | 3/27/2020 | Europe / France / ARA / Lyon         | Human Female | 32 | Original | Nasopharyngeal swab     | B.1     | GH |
| hCoV-19/France/ARA14953/2020 | EPI_ISL_508897 | 3/27/2020 | Europe / France / ARA / Lyon         | Human Female | 51 | Original | Nasopharyngeal swab     | B.1     | G  |
| hCoV-19/France/ARA14993/2020 | EPI_ISL_508898 | 3/27/2020 | Europe / France / ARA / Lyon         | Human Female | 93 | Original | Nasopharyngeal swab     | B.1     | G  |
| hCoV-19/France/ARA14997/2020 | EPI_ISL_508899 | 3/27/2020 | Europe / France / ARA / Lyon         | Human Female | 89 | Original | Nasopharyngeal swab     | B.1     | GH |
| hCoV-19/France/ARA15119/2020 | EPI_ISL_508900 | 3/27/2020 | Europe / France / ARA / Lyon         | Human Male   | 39 | Original | Nasopharyngeal swab     | B.1     | GH |
| hCoV-19/France/ARA15126/2020 | EPI_ISL_508901 | 3/27/2020 | Europe / France / ARA / Lyon         | Human Male   | 22 | Original | Nasopharyngeal swab     | B.1     | GH |
| hCoV-19/France/ARA15224/2020 | EPI_ISL_508902 | 3/27/2020 | Europe / France / ARA / Lyon         | Human Female | 41 | Original | Nasopharyngeal swab     | B.1     | G  |
| hCoV-19/France/ARA15296/2020 | EPI_ISL_508903 | 3/27/2020 | Europe / France / ARA / Lyon         | Human Female | 69 | Original | Nasopharyngeal aspirate | B.1     | GH |
| hCoV-19/France/ARA16170/2020 | EPI_ISL_508904 | 3/29/2020 | Europe / France / ARA / Lyon         | Human Male   | 72 | Original | Nasopharyngeal swab     | B.1     | G  |
| hCoV-19/France/ARA16213/2020 | EPI_ISL_508905 | 3/29/2020 | Europe / France / ARA / Lyon         | Human Female | 83 | Original | Nasopharyngeal swab     | B.1.1   | GR |
| hCoV-19/France/ARA16220/2020 | EPI_ISL_508906 | 3/29/2020 | Europe / France / ARA / Lyon         | Human Male   | 80 | Original | Nasopharyngeal swab     | B.1     | GH |
| hCoV-19/France/ARA16251/2020 | EPI_ISL_508907 | 3/29/2020 | Europe / France / ARA / Lyon         | Human Male   | 86 | Original | Nasopharyngeal swab     | B.1.1   | GR |
| hCoV-19/France/ARA16322/2020 | EPI_ISL_508908 | 3/30/2020 | Europe / France / ARA / Lyon         | Human Male   | 83 | Original | Nasopharyngeal aspirate | B.1     | G  |
| hCoV-19/France/ARA20756/2020 | EPI_ISL_508912 | 4/6/2020  | Europe / France / ARA / Lyon         | Human Female | 27 | Original | Nasopharyngeal swab     | B.1     | GH |
| hCoV-19/France/ARA20768/2020 | EPI_ISL_508913 | 4/6/2020  | Europe / France / ARA / Lyon         | Human Female | 97 | Original | Nasopharyngeal swab     | B.1     | GH |
| hCoV-19/France/ARA20829/2020 | EPI_ISL_508914 | 4/6/2020  | Europe / France / ARA / Lyon         | Human Female | 36 | Original | Nasopharyngeal swab     | B.1     | GH |
| hCoV-19/France/ARA20976/2020 | EPI_ISL_508915 | 4/6/2020  | Europe / France / ARA / Lyon         | Human Male   | 81 | Original | Nasopharyngeal swab     | B.1     | G  |
| hCoV-19/France/ARA21170/2020 | EPI_ISL_508916 | 4/7/2020  | Europe / France / ARA / Lyon         | Human Female | 42 | Original | Nasopharyngeal swab     | B.1     | GH |
| hCoV-19/France/ARA2221/2020  | EPI_ISL_508917 | 4/8/2020  | Europe / France / ARA / Lyon         | Human Female | 91 | Original | Nasopharyngeal swab     | B.1     | G  |
| hCoV-19/France/ARA22592/2020 | EPI_ISL_508918 | 4/9/2020  | Europe / France / ARA / Lyon         | Human Male   | 26 | Original | Nasopharyngeal swab     | B.1.1.7 | GR |
| hCoV-19/France/ARA22647/2020 | EPI_ISL_508919 | 4/9/2020  | Europe / France / ARA / Lyon         | Human Male   | 80 | Original | Nasopharyngeal swab     | B.1     | GH |
| hCoV-19/France/ARA22650/2020 | EPI_ISL_508920 | 4/9/2020  | Europe / France / ARA / Lyon         | Human Female | 84 | Original | Nasopharyngeal swab     | B.1     | GH |
| hCoV-19/France/ARA22670/2020 | EPI_ISL_508921 | 4/9/2020  | Europe / France / ARA / Lyon         | Human Male   | 88 | Original | Nasopharyngeal swab     | B.1     | G  |
| hCoV-19/France/ARA22864/2020 | EPI_ISL_508922 | 4/9/2020  | Europe / France / ARA / Lyon         | Human Female | 98 | Original | Nasopharyngeal swab     | B.1     | GH |
| hCoV-19/France/ARA23001/2020 | EPI_ISL_508923 | 4/10/2020 | Europe / France / ARA / Lyon         | Human Male   | 49 | Original | Nasopharyngeal swab     | B.1     | G  |
| hCoV-19/France/ARA23076/2020 | EPI_ISL_508924 | 4/10/2020 | Europe / France / ARA / Lyon         | Human Male   | 55 | Original | Nasopharyngeal swab     | B.1     | GH |
| hCoV-19/France/ARA23092/2020 | EPI_ISL_508925 | 4/10/2020 | Europe / France / ARA / Lyon         | Human Female | 61 | Original | Nasopharyngeal swab     | B.1     | G  |
| hCoV-19/France/ARA23121/2020 | EPI_ISL_508926 | 4/10/2020 | Europe / France / ARA / Lyon         | Human Female | 82 | Original | Nasopharyngeal swab     | B.1     | GH |
| hCoV-19/France/ARA23544/2020 | EPI_ISL_508927 | 4/11/2020 | Europe / France / ARA / Lyon         | Human Male   | 60 | Original | Nasopharyngeal swab     | B.1     | G  |
| hCoV-19/France/ARA23813/2020 | EPI_ISL_508928 | 4/11/2020 | Europe / France / ARA / Lyon         | Human Male   | 23 | Original | Nasopharyngeal swab     | B.1     | GH |
| hCoV-19/France/ARA23893/2020 | EPI_ISL_508929 | 4/11/2020 | Europe / France / ARA / Lyon         | Human Male   | 89 | Original | Nasopharyngeal swab     | B.1.1   | GR |
| hCoV-19/France/ARA23943/2020 | EPI_ISL_508930 | 4/12/2020 | Europe / France / ARA / Lyon         | Human Female | 63 | Original | Nasopharyngeal swab     | B.1     | GH |
| hCoV-19/France/ARA24023/2020 | EPI_ISL_508931 | 4/11/2020 | Europe / France / ARA / Tarare       | Human Female | 25 | Original | Nasopharyngeal swab     | B.1     | GH |
| hCoV-19/France/ARA24115/2020 | EPI_ISL_508932 | 4/12/2020 | Europe / France / ARA / Villefranche | Human Female | 45 | Original | Nasopharyngeal swab     | B.1     | G  |
| hCoV-19/France/ARA05288/2020 | EPI_ISL_508933 | 2/28/2020 | Europe / France / ARA / Lyon         | Human Female | 78 | Original | Nasopharyngeal swab     | B.1     | GH |
| hCoV-19/France/ARA0591/2020  | EPI_ISL_508934 | 3/1/2020  | Europe / France / ARA / Chambéry     | Human Male   | 29 | Original | Nasopharyngeal swab     | B.1     | G  |
| hCoV-19/France/ARA0592/2020  | EPI_ISL_508935 | 3/2/2020  | Europe / France / ARA / Chambéry     | Human Female | 48 | Original | Nasopharyngeal swab     | B.1     | G  |
| hCoV-19/France/ARA06032/2020 | EPI_ISL_508936 | 3/4/2020  | Europe / France / ARA / Chambéry     | Human Male   | 57 | Original | Nasopharyngeal swab     | B.1     | G  |

|                              |                |           |                                            |              |    |          |                         |       |    |
|------------------------------|----------------|-----------|--------------------------------------------|--------------|----|----------|-------------------------|-------|----|
| hCoV-19/France/ARA06923/2020 | EPI_ISL_508937 | 3/9/2020  | Europe / France / ARA / Lyon               | Human Female | 78 | Original | Nasopharyngeal swab     | B.1   | G  |
| hCoV-19/France/ARA07055/2020 | EPI_ISL_508938 | 3/9/2020  | Europe / France / ARA / Bourg-en-Bresse    | Human Female | 73 | Original | Nasopharyngeal swab     | B.1   | GH |
| hCoV-19/France/ARA07148/2020 | EPI_ISL_508939 | 3/9/2020  | Europe / France / ARA / Lyon               | Human Female | 90 | Original | Nasopharyngeal swab     | B.1   | GH |
| hCoV-19/France/ARA07169/2020 | EPI_ISL_508940 | 3/9/2020  | Europe / France / ARA / Lyon               | Human Female | 32 | Original | Nasopharyngeal swab     | B.1   | GH |
| hCoV-19/France/ARA0731/2020  | EPI_ISL_508941 | 3/10/2020 | Europe / France / ARA / Macon              | Human Male   | 93 | Original | Nasopharyngeal aspirate | B.1   | GH |
| hCoV-19/France/ARA07314/2020 | EPI_ISL_508942 | 3/10/2020 | Europe / France / ARA / Lyon               | Human Female | 90 | Original | Nasopharyngeal swab     | B.1   | G  |
| hCoV-19/France/ARA07722/2020 | EPI_ISL_508943 | 3/11/2020 | Europe / France / ARA / Macon              | Human Male   | 72 | Original | Nasopharyngeal aspirate | B.1   | GH |
| hCoV-19/France/ARA07731/2020 | EPI_ISL_508944 | 3/11/2020 | Europe / France / ARA / Bourg-en-Bresse    | Human Male   | 33 | Original | Nasopharyngeal swab     | B     | L  |
| hCoV-19/France/ARA0779/2020  | EPI_ISL_508945 | 3/11/2020 | Europe / France / ARA / Macon              | Human Female | 72 | Original | Nasopharyngeal aspirate | B.1   | GH |
| hCoV-19/France/ARA08067/2020 | EPI_ISL_508946 | 3/12/2020 | Europe / France / ARA / Macon              | Human Male   | 63 | Original | Nasopharyngeal aspirate | B.1   | GH |
| hCoV-19/France/ARA0814/2020  | EPI_ISL_508947 | 3/12/2020 | Europe / France / ARA / Vienne             | Human Female | 61 | Original | Nasopharyngeal aspirate | B.1   | GH |
| hCoV-19/France/ARA08417/2020 | EPI_ISL_508948 | 3/13/2020 | Europe / France / ARA / Lyon               | Human Male   | 92 | Original | Nasopharyngeal aspirate | B.1   | G  |
| hCoV-19/France/ARA12155/2020 | EPI_ISL_508949 | 3/21/2020 | Europe / France / ARA / Macon              | Human Female | 57 | Original | Nasopharyngeal aspirate | B.1   | G  |
| hCoV-19/France/ARA12282/2020 | EPI_ISL_508950 | 3/22/2020 | Europe / France / ARA / Macon              | Human Male   | 34 | Original | Nasopharyngeal aspirate | B.1   | GH |
| hCoV-19/France/ARA12287/2020 | EPI_ISL_508951 | 3/22/2020 | Europe / France / ARA / Lyon               | Human Female | 90 | Original | Nasopharyngeal aspirate | B.1   | GH |
| hCoV-19/France/ARA12638/2020 | EPI_ISL_508952 | 3/23/2020 | Europe / France / ARA / Macon              | Human Male   | 49 | Original | Nasopharyngeal aspirate | B.1   | GH |
| hCoV-19/France/ARA12742/2020 | EPI_ISL_508953 | 3/23/2020 | Europe / France / ARA / Lyon               | Human Male   | 92 | Original | Nasopharyngeal swab     | B.1   | GH |
| hCoV-19/France/ARA13353/2020 | EPI_ISL_508954 | 3/24/2020 | Europe / France / ARA / Lyon               | Human Female | 34 | Original | Nasopharyngeal swab     | B.1   | G  |
| hCoV-19/France/ARA13367/2020 | EPI_ISL_508955 | 3/24/2020 | Europe / France / ARA / Lyon               | Human Female | 82 | Original | Nasopharyngeal swab     | B.1   | G  |
| hCoV-19/France/ARA13374/2020 | EPI_ISL_508956 | 3/24/2020 | Europe / France / ARA / Lyon               | Human Male   | 93 | Original | Nasopharyngeal swab     | B.1   | G  |
| hCoV-19/France/ARA13515/2020 | EPI_ISL_508957 | 3/24/2020 | Europe / France / ARA / Lyon               | Human Male   | 86 | Original | Nasopharyngeal swab     | B.1   | G  |
| hCoV-19/France/ARA17177/2020 | EPI_ISL_508958 | 3/30/2020 | Europe / France / ARA / Contamine-sur-Arve | Human Female | 55 | Original | Nasopharyngeal swab     | B.1.1 | GR |
| hCoV-19/France/ARA17330/2020 | EPI_ISL_508959 | 3/31/2020 | Europe / France / ARA / Lyon               | Human Male   | 96 | Original | Nasopharyngeal swab     | B.1   | GH |
| hCoV-19/France/ARA17747/2020 | EPI_ISL_508960 | 3/31/2020 | Europe / France / ARA / Lyon               | Human Male   | 78 | Original | Nasopharyngeal swab     | B.1   | G  |
| hCoV-19/France/ARA1783/2020  | EPI_ISL_508961 | 4/1/2020  | Europe / France / ARA / Lyon               | Human Male   | 90 | Original | Nasopharyngeal swab     | B.1   | G  |
| hCoV-19/France/ARA1811/2020  | EPI_ISL_508962 | 4/1/2020  | Europe / France / ARA / Lyon               | Human Male   | 83 | Original | Nasopharyngeal swab     | B.1   | GH |
| hCoV-19/France/ARA18212/2020 | EPI_ISL_508963 | 4/1/2020  | Europe / France / ARA / Lyon               | Human Male   | 88 | Original | Nasopharyngeal swab     | B.1   | GH |
| hCoV-19/France/ARA18272/2020 | EPI_ISL_508964 | 4/2/2020  | Europe / France / ARA / Lyon               | Human Male   | 56 | Original | Nasopharyngeal swab     | B.1   | G  |
| hCoV-19/France/ARA18275/2020 | EPI_ISL_508965 | 4/2/2020  | Europe / France / ARA / Lyon               | Human Male   | 69 | Original | Nasopharyngeal swab     | B.1   | GH |
| hCoV-19/France/ARA18314/2020 | EPI_ISL_508966 | 4/2/2020  | Europe / France / ARA / Bourgoin-Jallieu   | Human Female | 43 | Original | Nasopharyngeal swab     | B.1   | G  |
| hCoV-19/France/ARA18366/2020 | EPI_ISL_508967 | 4/2/2020  | Europe / France / ARA / Lyon               | Human Female | 85 | Original | Nasopharyngeal swab     | B.1   | GH |
| hCoV-19/France/ARA18437/2020 | EPI_ISL_508968 | 4/2/2020  | Europe / France / ARA / Bourg-en-Bresse    | Human Female | 30 | Original | Nasopharyngeal swab     | B.1.1 | GR |
| hCoV-19/France/ARA18440/2020 | EPI_ISL_508969 | 4/2/2020  | Europe / France / ARA / Lyon               | Human Female | 27 | Original | Nasopharyngeal swab     | B.1   | G  |
| hCoV-19/France/ARA18487/2020 | EPI_ISL_508970 | 4/2/2020  | Europe / France / ARA / Lyon               | Human Female | 50 | Original | Nasopharyngeal swab     | B.1.1 | GR |
| hCoV-19/France/ARA18625/2020 | EPI_ISL_508971 | 4/2/2020  | Europe / France / ARA / Lyon               | Human Male   | 96 | Original | Nasopharyngeal swab     | B.1   | GH |
| hCoV-19/France/ARA18634/2020 | EPI_ISL_508972 | 4/2/2020  | Europe / France / ARA / Lyon               | Human Male   | 52 | Original | Nasopharyngeal swab     | B.1   | GH |
| hCoV-19/France/ARA18748/2020 | EPI_ISL_508973 | 4/2/2020  | Europe / France / ARA / Lyon               | Human Female | 88 | Original | Nasopharyngeal swab     | B.1.1 | GR |
| hCoV-19/France/ARA18783/2020 | EPI_ISL_508974 | 4/3/2020  | Europe / France / ARA / Lyon               | Human Female | 38 | Original | Nasopharyngeal swab     | B.1   | G  |

|                              |                          |                                            |              |    |          |                         |       |    |
|------------------------------|--------------------------|--------------------------------------------|--------------|----|----------|-------------------------|-------|----|
| hCoV-19/France/ARA18826/2020 | EPI_ISL_508975 4/2/2020  | Europe / France / ARA / Bourgoin-Jallieu   | Human Female | 70 | Original | Nasopharyngeal swab     | B.1   | GH |
| hCoV-19/France/ARA19119/2020 | EPI_ISL_508976 4/1/2020  | Europe / France / ARA / Decines            | Human Female | 29 | Original | Nasopharyngeal swab     | B.1   | GH |
| hCoV-19/France/ARA19311/2020 | EPI_ISL_508977 4/3/2020  | Europe / France / ARA / Lyon               | Human Female | 22 | Original | Nasopharyngeal swab     | B.1   | G  |
| hCoV-19/France/ARA19340/2020 | EPI_ISL_508978 4/3/2020  | Europe / France / ARA / Villefranche       | Human Female | 37 | Original | Nasopharyngeal swab     | B.1   | GH |
| hCoV-19/France/ARA19556/2020 | EPI_ISL_508979 4/3/2020  | Europe / France / ARA / Lyon               | Human Male   | 33 | Original | Nasopharyngeal swab     | B.1   | GH |
| hCoV-19/France/ARA19570/2020 | EPI_ISL_508980 4/3/2020  | Europe / France / ARA / Lyon               | Human Male   | 65 | Original | Nasopharyngeal swab     | B.1   | G  |
| hCoV-19/France/ARA19928/2020 | EPI_ISL_508981 4/4/2020  | Europe / France / ARA / Lyon               | Human Male   | 77 | Original | Nasopharyngeal swab     | B.1   | GH |
| hCoV-19/France/ARA20073/2020 | EPI_ISL_508982 4/5/2020  | Europe / France / ARA / Lyon               | Human Male   | 92 | Original | Nasopharyngeal swab     | B.1   | GH |
| hCoV-19/France/ARA20154/2020 | EPI_ISL_508983 4/5/2020  | Europe / France / ARA / Lyon               | Human Female | 79 | Original | Nasopharyngeal swab     | B.1   | GH |
| hCoV-19/France/ARA20193/2020 | EPI_ISL_508984 4/5/2020  | Europe / France / ARA / Lyon               | Human Female | 34 | Original | Nasopharyngeal swab     | B.1   | G  |
| hCoV-19/France/ARA20254/2020 | EPI_ISL_508985 4/5/2020  | Europe / France / ARA / Lyon               | Human Male   | 81 | Original | Nasopharyngeal swab     | B.1.1 | GR |
| hCoV-19/France/ARA13746/2020 | EPI_ISL_508986 3/25/2020 | Europe / France / ARA / Lyon               | Human Female | 84 | Original | Nasopharyngeal swab     | B.1   | GH |
| hCoV-19/France/ARA16665/2020 | EPI_ISL_508987 3/30/2020 | Europe / France / ARA / Lyon               | Human Female | 89 | Original | Nasopharyngeal swab     | B.1   | GH |
| hCoV-19/France/ARA2068/2020  | EPI_ISL_508988 4/6/2020  | Europe / France / ARA / Lyon               | Human Female | 82 | Original | Nasopharyngeal swab     | B.1   | GH |
| hCoV-19/France/ARA21360/2020 | EPI_ISL_508989 4/7/2020  | Europe / France / ARA / Lyon               | Human Female | 94 | Original | Nasopharyngeal swab     | B.1   | GH |
| hCoV-19/France/ARA20869/2020 | EPI_ISL_508990 4/6/2020  | Europe / France / ARA / Lyon               | Human Female | 56 | Original | Nasopharyngeal swab     | B.1   | GH |
| hCoV-19/France/ARA21154/2020 | EPI_ISL_508991 4/7/2020  | Europe / France / ARA / Lyon               | Human Female | 57 | Original | Nasopharyngeal swab     | B.1   | G  |
| hCoV-19/France/ARA21163/2020 | EPI_ISL_508992 4/7/2020  | Europe / France / ARA / Lyon               | Human Female | 30 | Original | Nasopharyngeal swab     | B.1   | GH |
| hCoV-19/France/ARA21210/2020 | EPI_ISL_508993 4/7/2020  | Europe / France / ARA / Lyon               | Human Male   | 41 | Original | Nasopharyngeal swab     | B.1   | G  |
| hCoV-19/France/ARA21399/2020 | EPI_ISL_508994 4/7/2020  | Europe / France / ARA / Lyon               | Human Female | 32 | Original | Nasopharyngeal swab     | B.1   | G  |
| hCoV-19/France/ARA21941/2020 | EPI_ISL_508995 4/8/2020  | Europe / France / ARA / Lyon               | Human Male   | 48 | Original | Nasopharyngeal swab     | B.1   | G  |
| hCoV-19/France/ARA22088/2020 | EPI_ISL_508996 4/8/2020  | Europe / France / ARA / Lyon               | Human Female | 91 | Original | Nasopharyngeal swab     | B.1   | GH |
| hCoV-19/France/ARA22132/2020 | EPI_ISL_508997 4/8/2020  | Europe / France / ARA / Lyon               | Human Male   | 29 | Original | Nasopharyngeal swab     | B.1   | G  |
| hCoV-19/France/ARA10441/2020 | EPI_ISL_508998 3/17/2020 | Europe / France / ARA / Bourgoin-Jallieu   | Human Female | 71 | Original | Nasopharyngeal swab     | B.1   | GH |
| hCoV-19/France/ARA10580/2020 | EPI_ISL_508999 3/18/2020 | Europe / France / ARA / Lyon               | Human Male   | 72 | Original | Nasopharyngeal swab     | B.1   | G  |
| hCoV-19/France/ARA10821/2020 | EPI_ISL_509000 3/18/2020 | Europe / France / ARA / Lyon               | Human Male   | 30 | Original | Nasopharyngeal swab     | B.1   | G  |
| hCoV-19/France/ARA10863/2020 | EPI_ISL_509001 3/18/2020 | Europe / France / ARA / Lyon               | Human Female | 86 | Original | Nasopharyngeal swab     | B.1   | G  |
| hCoV-19/France/ARA1125/2020  | EPI_ISL_509002 3/19/2020 | Europe / France / ARA / Lyon               | Human Female | 26 | Original | Nasopharyngeal swab     | B.1   | GH |
| hCoV-19/France/ARA9584/2020  | EPI_ISL_509003 3/16/2020 | Europe / France / ARA / Venissieux         | Human Male   | 58 | Original | Nasopharyngeal swab     | B.1   | GH |
| hCoV-19/France/ARA9476/2020  | EPI_ISL_509004 3/16/2020 | Europe / France / ARA / Venissieux         | Human Male   | 51 | Original | Nasopharyngeal swab     | B.2.1 | V  |
| hCoV-19/France/ARA12151/2020 | EPI_ISL_509005 3/21/2020 | Europe / France / ARA / Macon              | Human Male   | 84 | Original | Nasopharyngeal aspirate | B.1   | GH |
| hCoV-19/France/ARA12197/2020 | EPI_ISL_509006 3/22/2020 | Europe / France / ARA / Villefranche       | Human Female | NA | Original | Nasopharyngeal swab     | B.1   | GH |
| hCoV-19/France/ARA1276/2020  | EPI_ISL_509007 3/23/2020 | Europe / France / ARA / Lyon               | Human Female | 48 | Original | Nasopharyngeal swab     | B.1   | G  |
| hCoV-19/France/ARA12740/2020 | EPI_ISL_509008 3/23/2020 | Europe / France / ARA / Lyon               | Human Female | 67 | Original | Nasopharyngeal swab     | B.1   | GH |
| hCoV-19/France/ARA16647/2020 | EPI_ISL_509009 3/25/2020 | Europe / France / ARA / Lyon               | Human Male   | 83 | Original | Nasopharyngeal swab     | B.1   | G  |
| hCoV-19/France/ARA02052/2020 | EPI_ISL_509010 3/30/2020 | Europe / France / ARA / Lyon               | Human Female | 79 | Original | Nasopharyngeal swab     | B.1   | G  |
| hCoV-19/France/ARA17037/2020 | EPI_ISL_509011 3/31/2020 | Europe / France / ARA / Lyon               | Human Male   | 49 | Original | Nasopharyngeal swab     | B.1   | GH |
| hCoV-19/France/ARA17181/2020 | EPI_ISL_509012 3/30/2020 | Europe / France / ARA / Contamine-sur-Arve | Human Female | 26 | Original | Nasopharyngeal swab     | B.1   | GH |

|                              |                          |                                      |              |    |          |                     |     |    |
|------------------------------|--------------------------|--------------------------------------|--------------|----|----------|---------------------|-----|----|
| hCoV-19/France/ARA17410/2020 | EPI_ISL_509013 3/31/2020 | Europe / France / ARA / Lyon         | Human Female | 55 | Original | Nasopharyngeal swab | B.1 | G  |
| hCoV-19/France/ARA17573/2020 | EPI_ISL_509014 3/31/2020 | Europe / France / ARA / Lyon         | Human Female | 75 | Original | Nasopharyngeal swab | B.1 | G  |
| hCoV-19/France/ARA18066/2020 | EPI_ISL_509015 4/1/2020  | Europe / France / ARA / Villefranche | Human Male   | 72 | Original | Nasopharyngeal swab | B.1 | GH |
| hCoV-19/France/ARA18148/2020 | EPI_ISL_509016 4/1/2020  | Europe / France / ARA / Oyonnax      | Human Male   | 58 | Original | Nasopharyngeal swab | B.1 | GH |
